# Supplementary material
Source: publisher figshare collection journal article supplement (https://gsapubs.figshare.com/articles/dataset/_/12536309)
Supplement: Supplementary file 1 [file 1]

## Sheet: DR1
Ancuta, L.D., Zeitler, P.K., Idleman, B.D., and Jordan, B.T., 2018, Whole-rock 40Ar/39Ar geochronology, geochemistry, and stratigraphy of intraplate Cenozoic volcanic rocks, central Mongolia: GSA Bulletin, https://doi.org/10.1130/B31788.1. GSA Data Repository Item 2018114
Table DR1. Sample Descriptions
Sample No.	Latitude	Longitude	Description	Irradition	Packet #	Weight (mg)	Mineral	Grade	Lab Notes
CI-11-1	48.1721	100.438	basalt		R	1.502	GM	C-	fine grain. Med grey. Brittle. Plag glass oxides pyroxene all small. Brittle. Lots of olivine in almost all grains.
CI-11-2	48.213	100.396	basalt	I57	W	2.59	GM	C	Coarse grain. Brittle. Light grey. Large plag xtals. Lots of olivine larger olivine removed.
CI-11-3	48.2347	100.235	basalt	I57	Y	2.432	GM	C+	med coarse grain. Light grey. Large glass and plag. Brittle.
CI-11-4	48.0818	99.9177	basalt	I57	\U/	3.573	GM	B	very dark fine grain. Some larger plag or glass. Mineral id not possible.
CI-11-6	48.0818	99.9177	basalt	I57	S	1.86	GM	C-	med grain. Lots of olivine that is altered to a red brown color. Grains are brittle.
CI-11-11	48.0988	99.9225	basalt	I57	V	3.511	GM	B+	med coarse grain. Large plag and glass medium oxides and pyroxene.
CI-11-12	48.0051	99.7479	basalt	I57	T	3.112	GM	B	med grain very dark. Oxides and pyroxene dominant. Glass my be very dark as well. Some larger Plag.
11mola1	47.5216	100.607	basalt	I57	B6	5.5	GM	B	light grey. Plag and glass dominant. Small oxides and pyroxene
11mola2	47.1998	100.12	basalt	I57	B7	3.015	GM	B	fine grain dark. Minor red discoloration of some mineral in few grains, possibly olive alteration. Glass, plag oxides, pyroxene look ok
11mola3	47.1996	100.12	basalt	I57	C3	2	GM	B	Fine grain. Plag and glass dominant. Small mafic. Some light green yellow tint to some GM grains.
11mola4	47.1998	100.12	basalt	I57	C2	1.91	GM	B	fine grain dark. Some larger euhedral plag. Minor altered olivine removed
11mola5	47.1992	100.118	basalt	I57	B8	3.53	GM	B	fine grain very dark hard to id minerals. Some larger plag xtals. Minor olivine phenocrysts. Some may have been altered to iddigsite
11mola6	47.1998	100.117	basalt	I57	B9	4.19	GM	C-	med to coarse grain. Large glass and plag. Some glass and olive discolored. Smaller pyroxene and oxides. Large olivine and glass grain removed.
11mola7	47.2	100.116	basalt	I57	B5	3.94	GM	B-	Med grain. Plag, glass, oxides, mafics. Minor olivine. Some slight red discoloration
11mola8	47.2001	100.115	basalt	I57	B3	4.21	GM	B+	Fine to med grain dark gm. Minor olivine in most grains
11mola9	47.2002	100.114	basalt	I57	.Q.	3.701	GM	C+	fine grain. Plag, glass, pyroxene, oxides. All grains have a slight red tint. Possibly some alteration of glass or olivine. Some large altered olives removed
11mola10	47.3338	100.196	basalt	I57	C4	3.37	GM	B	med grey opaque grains. Med grain. Larger plag and glass. Plag sometimes euhedral. Small oxide and pyroxene.
11mola11	47.2002	100.112	basalt
11mola13	47.47	100.246	basalt	I57	C1	3.69	GM	B+	med grain light grey. Plag and glass dominant. Small oxides and pyroxenes. Some large olivine removed.
11mola14	47.4896	100.312	basalt	I57	B4	4.42	GM	B+	med color. Med grain. Plag, glass, pyroxene. Oxides.
11mola15	47.4905	100.229	basalt	I57	C5	3.2	GM	B+	med to dark grey. Fine to med grain. Minor olivine
11mola16	47.4905	100.229	basalt	I55	A1	2.8	GM	B-	ok GM. Med grain. Gm dominated by plag. Minor oxides and mafics. Some brown devitrified glass. No other phenocrysts observed.
11mola17	47.4905	100.229	basalt	I55	A2	3.1	GM	C-	avg to poor gm. Med grain. Clear plag. Minor mafic minerals. Some brown/red devitrified glass. Minor olivine.
11mola18	47.4452	100.215	basalt	I55	A3	2.5	GM	C	avg GM. Pale yellow gm grains. Possible devitrified glass. Gm is mostly plag, glass, oxides. Very minor pyroxene and olivine phenocrysts.
11mola19	47.4452	100.215	basalt	I55	A4	3.01	GM	A	good gm. Med grain. GM mostly clear. Euhedral plag. Smaller oxides. Some large glass grains. Little to no olivine.
11mola20	47.4454	100.214	basalt	I55	A5	2.85	GM	B	Good gm. Large plag, smaller pyroxene and oxides. Glass and plag are clear. Some olivine phenocrysts.
11mola21	47.4443	100.214	basalt	I55	A6	1.8	GM	B-	avg GM. Very fine. minor olivine and pyroxene phenocrysts picked out. Possible minor devitrified glass
11mola22	47.4438	100.214	basalt	I55	A7	3	GM	B	ok GM. Large pyroxene. Gm dominated by pyroxene and glass. Mafics are very minor and small. Glass and pyroxene are clear. Some large glass chips.
11mola23	47.4422	100.195	basalt	I55	A8	3.3	GM	B-	avg GM. Fine. Mix of oxides, plag pyroxene and some olivine in GM. Some minor devitrified glass.
11mola24	47.4422	100.195	basalt	I55	A9	2.8	GM	B-	avg GM. Fine grain . Plag phenocrysts left in. Even mix of large pyroxene, plag and oxides. Minor amounts of small olivine. Minor red minerals picked out possibly devitrified glass.
11mola25	47.4261	100.197	basalt	I55	B1	2.01	GM	B	ok GM. Dominated by plag and glass, minor mafics. Some very minor red minerals in gm picked out. Possibly devitrified glass-very minor.
11mola26	47.4261	100.197	quartzite					-
11mola27	47.4261	100.197	quartzite					-
11mola28	47.1092	99.6855	basalt	I55	B2	1.5	GM	B	OK GM. Med grain. Lots of olivine, moderately magnetic. Plag is clear, glass is clear. Minor pyroxene, olivine picked out, mostly in phenocrysts.
11mola29	47.193	99.6482	basalt	I55	B3	2.88	GM	C	avg GM. Coarse grain. Large milky plag. Mafics and oxides also large. Some red minerals picked out. Minor olivine phenocrysts
11mola30	47.193	99.6482	basalt	I55	B4	1.33	GM	C+	ok GM, small gm all minerals
11mola31	47.193	99.6482	basalt	I55	B5	3.14	GM	C	GM has some pale yellow grain. Possibly olivine or devitrified glass. Dominated by plag. Small oxides and pyroxene.
11mola32	47.193	99.6482	basalt
11mola33A	47.1362	99.7295	basalt	I55	B6	2.98	GM	B	Ok GM. Some olivine. Med grain plag. Plag is milky/grey. Small oxides.
llmoal33B	47.1362	99.7295	basalt	I55	B7	1.84	GM	C+	Med Grain, plag, glass dominant. Minor olivine. Red/brown mineral in GM (picked out)
11mola34	47.1389	99.7438	basalt	I55	B8	1.83	GM	C	Fine grain GM dark. Lots of plag phenocrysts. Picked Gm. Often with large plag grains left in if attached to GM. Some pyroxene and olivine phenocrysts were not picked.
11mola35	47.2056	99.8798	basalt	I55	B9	2.93	GM	B+	good GM. Fine grain. Dominated by plag and glass minor oxides and pyroxene. Minor olivine phenocrysts
11mola36	47.2031	99.8824	basalt	I55	C1	3.35	GM	C+	average GM. Very magnetic. Small magnetite grains in gm. GM is pale yellow to clear. Plag and mafics are all small.
11mola37	47.203	99.8842	basalt	I55	C2	2.88	GM	C-	poor GM. Lots of olivine. Some devitrified glass. GM has some small red minerals.
11mola38	47.2355	99.6735	basalt	I55	C3	2.21	GM	C+	Large grain GM. Plag and glass are dominant. Large plag. Some is milky. Med to large pyroxene and oxides
11mola39	47.2351	99.6726	basalt	I55	C4	2.51	GM	C+	Med Grain GM. Some pale yellow to brown discoloration of GM. Dominant minerals are Plag and glass with minor olivine, pyroxene and oxides
11mola40	47.2346	99.6722	basalt	I55	C5	2.77	GM	B	good GM, small mafics larger plag. Plag is clear. Some minor olivine. Few white milky colored unknown minerals. Some small pyroxene in gm.
11mola41	47.3336	100.107	basalt					F	NOT PICKED. Strong reaction with HN03
11mola42a	47.3331	100.107	basalt	I55	C6	2.91	GM	B	good gm, med grain, larger plag, glass, mirror smaller oxides and pyroxene. Some large red/brown minerals removed
11mola42b	47.3332	100.107	basalt	I55	C7	2.22	GM	B	good gm, med grain, larger plag, glass, minor smaller oxides and pyroxene. Some large red/brown minerals removed
11mola43	47.3332	100.108	basalt	I55	C8	1.86	GM	D+	Med grain GM. Most has a red/yellow tint. Possibly altered. Sample had weak reaction with HN03
11mola44	47.334	100.108	basalt	I55	C9	1.88	GM	C	Fine grain Gm. Dark. Some grains had red/yellow grains picked out. Minor olivine phenocrysts
11mola45	47.3327	100.11	basalt	I55	D1	2.83	GM	B-	Med grain. Plag glass dominate. Smaller oxides and pyroxene. Most gm has a red yellow tint. Clearest gm picked out
11mola46	47.2705	100.014	basalt	I55	D2	2.41	GM	B-	med grain GM. Lots of olivine phenos. Some olivine has been altered to iddingsite.. Gm dominated by plag with mafics and minor olivine.
11mola47	47.2715	100.014	basalt	I55	D3	1.57	GM	B-	Med to coarse grain GM. Large plag and glass. Smaller oxides and pyroxene. Some minor olivine. Some gm has red yellow tint possibly alteration.
11mola48	47.2698	100.009	basalt	I55	D4	1.32	GM	B	Fine to Med Grain GM. Milky to clear. Plag and glass most abundant. Minor small oxides and pyroxene. Some olivine picked out. Some grains have an white/yellow tint. Some larger plag and plag phenocrysts
11mola49	47.2695	100.009	basalt	I55	D5	2.44	GM	B	Fine grain. Plag and glass dominant. Small mafics. Some light green yellow tint to some GM grains.
11mola50	47.1988	100.121	basalt	I55	D6	1.83	GM	B	fine grain GM. Dark. Some plag phenocrysts. Minor olivine phenocrysts.
11mobi1	47.2004	100.109	basalt	I57	E3	2.93	GM	C-	chalky white grains. Med grain. Some red brown discoloration
11mobi2	47.2003	100.111	basalt	I57	E4	4.33	GM	C	fine to med grain. Chalky. Plag and glass dominant
11mobi3	47.2003	100.111	basalt	I57	B1	4.014	GM	B	dark gm. Fine mafics. Med sized plag. Some olivine phenocrysts removed.
11mobi4	47.2	100.106	basalt	I57	B2	4.206	GM	B-	med grey opaque grains. Med grain. Larger plag and glass. Plag sometimes euhedral. Small oxide any pyroxene. Some grains had slight yellow tint removed
11mobi5	47.205	100.103	basalt	I57	C6	4.2	GM	B-	Fine to med grain. Plag and glass larger and dominant. Minor small oxides and pyroxene
11mopz1	47.2332	100.096	basalt	I57	C7	3.6	GM	C-	Discolored pale yellow GM. Some olivine. Possibly some alteration of glass.
11mopz2	47.2337	100.097	basalt	I57	C8	1.5	GM	B	Med to fine grain GM. Plag, glass, pyroxene and oxides dominant. Some large plag phenocrysts picked out. Minor white chalky grains removed. Some GM is slightly darker, most is light
11mopz3	47.2061	99.8819	basalt	I57	D2	2.7	GM	B-	Med grain GM, very light. Minor mafics. Some olivine possible, some gm has a pale green tint
11mopz4	47.2043	99.8821	basalt	I57	D3	1.26	GM	B-	Med grain GM, very light. Minor mafics. Some olivine possible, some gm has a pale green tint
11mopz5a	47.3338	100.106	basalt
11mopz5b	47.3338	100.106	basalt
11mopz6	47.3338	100.106	tuff					-
11mopz7	47.3338	100.106	conglomerate					-
11mopz8	47.3323	100.107	basalt	I57	D4	3.73	GM	A	Med grain, salt and pepper. Plag, glass, pyroxenes oxides. No phenocrysts. A few red minerals picked out
11mopz9a	47.3314	100.107	basalt	I57	D5	2.34	GM	B-	Fine grain. Some large plag, lots of olivine megacrysts. Not all olivine was picked out. Lots of olivine in GM
11mopz9b	47.3314	100.107	basalt
11mopz10	47.3319	100.106	basalt	I57	D		GM	D-	Reactive
11mopz11	47.3323	100.106	basalt	I57	E	19.98	GM	D-	Reactive with nitric. Visually not bad. Clean looking GM. Minor grains have red/brown alteration minerals. Med grain. Plag and glass dominant. Smaller mafic minerals.
11mopz12	47.2696	100.015	basalt	I55	E5	3.1	GM	B+	Good gm. Med grain. Minor large glass grains picked out. Some large red minerals picked out. Gm looks fairly clean mostly glass and plag with minor oxides and pyroxene
11mopz13	47.2686	100.015	basalt	I57	D1	2.74	GM	C	Large grain GM. Glass, plag, pyroxene, olivine and oxides present. Larger more mafic GM or phenocrysts picked out.
11mopz14	47.268	100.018	basalt	I57	D6	2.51	GM	B	Med to fine grain GM. Opaque grains. Glass and plag dominant minor oxides and pyroxene.
11mokw006	47.1849	99.8764	basalt	I57	D7	2.19	GM	B	Med grain GM. Minor olivine, some red/yellow grains picked out. Pyroxene, plag, glass oxides dominant
11mokw007			basalt	I57	D8	3.77	GM	B	Very dark fine grain HM. Abundant plag phenocrysts.
11mokw005	47.1463	99.8914	basalt	I57	.H.	15.97	GM	D	Reactive with nitric. Picked for SH. Fine grain grungy GM. Some discoloration. Minor red brown grains removed
11mola51	47.5751	101.139	basalt	I55	D7	2.55	GM	B	Very dark fine grain GM. Mafic minerals seem dominant, hard to see. Some olivine and plag phenos picked out
11mola52	47.0752	101.038	basalt	I55	D8	3.58	GM	D	Dark med grain GM. Abundant Olivine, pyroxene. Glass is dark/maybe altered. Some larger Plag xtals. Chalky white mineral picked out.
11mola53	47.0752	101.038	basalt	I55	D9	2.28	GM	C-	Large grain GM. Plag, glass, pyroxene, oxides. Most gm has a red yellow tint. Possibly altered
11mola54	47.575	101.156	basalt	I55	E1	2.12	GM	C+	Med Grain GM. Some olivine pehneos, some are altered to iddingsite. Some minor olivine in GM. Mostly Plag and glass with small oxides and pyroxene
11mola55	47.5749	101.148	basalt	I55	E2	1.77	GM	C	Med grain Gm. Lots of olivine. Some evidence of alteration.
11mola56	47.4691	100.894	basalt	I55	E3	2.21	GM	C-	med grain Gm. Picked for TF
11mola57	47.4683	100.895	basalt	I55	E4	4.72	GM	C	Very dark GM. Fine grain, lots of pyroxene and oxides, minor large plag.
11mola58	47.4771	100.894	basalt	I55	E6	3.35	GM	C	Light med to large grain GM. Some brown/yellow discoloration of a few grains. Large pyroxene.
11mola59	46.8568	101.072	basalt	I51	A1	3.1	Ground Mass	B	Ok Gm. Picked for tf. Olivine dominate in gm, very fine grained. Pyroxene phenocrysts
11mola60	46.8568	101.571	basalt	I51	A2	25	Ground Mass	B+	Good Gm. Picked for SH ~25mg. Grains are mostly darker. Some milky white grains?
11mola61	46.8582	101.563	basalt	I51	A3	4.5	Ground Mass	A-	good Gm. Fine grained, Picked for TF ~4.5mg. Grains are light , very fined grained mafic. Minor olivine and pyroxene microclines
11mola62	46.858	101.563	basalt	I51	A4	3.1	Ground Mass	C-	Sub Par Gm. Coarse grained, picked for TF. Lots of pale yellow and amber grains (olivine, pyroxene?)
11mola63	46.8652	101.559	basalt	I51	A5	6.5	Ground Mass	B+	Good Gm. Lots of very small mafics, overall grains are dark. Fine grained. ~6.5gm for TF, very minor pyroxene and olivine microlites.
11mola64	46.859	101.557	basalt	I51	A6	3.2	Ground Mass	B-	Average Gm. Medium grain ~3.2mg picked for TF. Some plag. and olivine microlites
11mola65	46.9008	101.504	basalt	I51	A7	2.5	Ground Mass	C-	Coarse grained Gm. Lots of pale yellow polymineralic grains. TF Picked clear w/ abundant mafics ~2.5mg.
11mola66	46.9035	101.517	basalt	I51	A8	3.1	Ground Mass	C	Fine to Medium grain GM. Lots of amber and pale yellow grains, milky white brittle grains, lots of picking TF
11mola67	46.9117	101.533	basalt	I51	A9	4.1	Ground Mass	B-	Fine grained very mafic Gm. Grains nearly black. ~4.1mg Picked Gm for TF. Some elongate plag in dark gm grains. LM could be picked for plag. Some plag microlites, some pale yellow grains.
11mola68	46.9119	101.531	basalt	I51	B1	3.6	Ground Mass	B	Fine to Med grain Gm. Lots of pale yellow gm grains, picked mostly clear 3.6mg TF
11mola69	46.9114	101.528	basalt	I51	B2	24.2	Ground Mass	B-	very fine grained Gm w/ lots of mafics. ~24.2mg Picked for SH. Dark grains. Some minor olivine and plag microlites?
11mola70	46.9138	101.524	basalt	I51	B3	2.6	Ground Mass	B	Avg Gm. Fine to med grain, Picked for ~2.6mg TF. some pale yellow green in grains likely olivine.
11mola71	46.9137	101.524	basalt	I51	B4	3.9	Ground Mass	B-	med grain Gm.~3.9mg Picked for TF. Lots of small olivine? In gm. Most greens have a green yellow tint, clearest grains picked
11mola72	46.9186	101.53	basalt	I51	B5	2.8	Ground Mass	C-	med grain Gm. Picked for ~2.8mg TF. Grains have a red yellow tint, alteration?. Some larger pyroxene and plag grains
11mola73	46.9188	101.517	basalt	I51	B6	3.5	Ground Mass	B	fine to med grain some olivine. ~3.5mg for TF. A few grains have light red to ruby color
11mola74	46.9176	101.536	basalt	I51	B7	3.2	Ground Mass	C+	Med grain very dark gm. Picked for~3.2mg TF. Loaded with mafics, pyroxene? Some brittle grains, Plag phenos, LM could be picked for plag
11mola75	46.9179	101.534	granite					-
11mola76	46.7983	101.688	basalt	I51	B8	3	Ground Mass	B	Med grain Gm. ~3mg picked for TF good clear pl or glass with a few small mafics. Some grains have olivine.
11mola77	46.7977	101.687	basalt					F	NOT PICKED, Strong reaction w/ HNO3
11mola78	46.8218	101.699	basalt	I51	B9	3.9	Ground Mass	B	Fine grained dark Gm. ~3.9mg Picked for TF. Some dark red grains
11mola79	46.8218	101.699	basalt	I51	C1	3.1	Ground Mass	C	coarse grain, Lots of mafics in clear glass/plag. Picked for TF. Some orange dark red grains. Sample was sticky
11mola80	46.8218	101.699	basalt	I51	C2	3	Ground Mass	C+	Med grain, clear to light grey gm. ~3mg. Some small mafics and a fair amount of olivine in some gm. Picked for TF
11mola81	46.8218	101.699	basalt	I51	C3	3.1	Ground Mass	B-	very dark, med grain gm. ~3.1mg Picked for tf. Lots of pyroxene in gm. Some plag phenos. Moderate olivine in Gm
11mola82	46.8218	101.699	basalt	I51	C4	3.2	Ground Mass	B-	fine to Med grain Gm,~3.2mg Picked for TF most has a light yellow to grey tint. Possibly from olivine or alteration, finem mafics.
11mola83	46.8218	101.699	basalt	I51	C5	20	Ground Mass	B	Med Grain GM ~20mg Picked for SH. Light colored grains. Some have yellow/green tint. Possibly olivine, few plag phenos, mafics are fine grained
11mola84a	45.7697	100.915	basalt	I51	C6	3.1	Ground Mass	C-	fine to med GM. Med grey. ~3.1mg Picked for TF. Most grains have small red/orange xtals?
11mola84b	45.7697	100.915	basalt	I51	C7	2.6	Ground Mass	C-	fine to med GM. Med grey. ~2.6mg Picked for TF. Most grains have small red/orange xtals?
11mola85	45.7697	100.915	basalt					F	NOT PICKED, Strong reaction w/ HNO3
11mola86	45.5235	100.884	basalt					F	NOT PICKED, Strong reaction w/ HNO3
11mola87	45.4866	101.014	basalt	I51	C8	22	Ground Mass	B	fine to med grain GM. ~22mg Picked for SH. dark lots of mafics. Some grains have small red grains, picked out Some olivine phenos (yellow).
11mola88	45.4933	101.04	basalt	I51	C9	3.4	Ground Mass	B	fine to me grain, dark. ~3.4mg picked for TF. Some chalky white brittle grains. Some small red brown xtals in gm
11mola89	45.5059	101.104	basalt	I51	D1	4.6	Ground Mass	B+	med grain, light. ~4.6mg picked for TF. Some grains have a red/yellow tint (picked out)
11mola90	45.5069	101.091	basalt	I51	D2	3.2	Ground Mass	C	fine to med grain, med/light color ~3.2mg picked for TF some grains have green tint/xtals olivine? Other red/yellow grains? Mafics generally small.
11mola91	45.7204	101.069	basalt					F	NOT PICKED, Strong reaction w/ HNO3
11mola92	45.722	101.064	basalt	I51	D3	2.8	Ground Mass	C-	med to coarse grain. Light color to clear ~2.8mg GM picked for TF. Olivine in gm. Some dark red orange xtals in GM and as phenos. Mafics medium grain size
11mola93	47.129	100.948	basalt	I51	D4	3.4	Ground Mass	D	Fine to med grain GM. ~3.4mg GM Picked for TF. Light color though all grains have a red brown tint. Olivine phenos. Large dark red xtals. Some chalky brittle grains.
11mola94	47.132	100.95	basalt	I51	D5	3.4	Ground Mass	C	Fine to med grain GM ~3.4mg GM picked for TF. Most/all grains have green tint, lots of olivine?
11mola95	47.132	100.95	basalt	I51	D6	4.1	Ground Mass	C	Med to lrg grain GM. ~4.1mg picked for TF. Olivine phenos. Some grains have a dark/green tint maybe olivine. Larger and abundant mafics
11mola96	47.1336	100.95	basalt	I51	D7	20	Ground Mass	C	med grain GM. ~20mg picked for SH. Lots of olivine. Most grains have a slight green tint. A few chalky white grains, minor larger olivine phenos. A few grains have some red/brn
11mola97	47.1355	100.949	basalt	I51	D8	3.3	Ground Mass	C+	fine to med grain GM. ~3.3mg picked for TF. Small mafics, generally clear plag/glass. Slight discoloration in some gm, green to red tints. A few larger red xtals. Some very dark grains pyroxenes? , a few chalky grains.
11mola98	47.1436	100.955	basalt	I51	D9	3.2	Ground Mass	C-	med to lrg grain GM. Most off color, red tint some w/ green tint. ~3.2mg picked for TF. Grains lack good clarity. Some chalky grins. Plag. Phenos.
11mola99	47.1414	100.959	basalt	I51	E1	2.8	Ground Mass	C-	med grain GM. Most has a green tint (olivine?) ~mg picked for TF. Lots of white chalky grains.
11mola100	47.2046	101.044	basalt	I51	E2	4	Ground Mass	B-	fine to med GM. Some grains have red brown tint. Clear grains picked for TF (4.04mg). Some large red/brown/yellow grains. A few large mafics but mostly small in GM.
11mola101	47.2973	101.125	basalt	I51	E3	3.1	Ground Mass	C-	Coarse GM, Picked GM for TF. Picked from LMM fraction. Lots of plag or glass phenocrysts. Large pyroxene grains. Some grey brittle grains. A few red/brown grains
11mola102	47.2896	101.126	basalt					F	NOT PICKED, Strong reaction w/ HNO3
11mola103	47.2902	101.126	basalt	I51	E4	29.7	Plagioclase	C	Picked for plag TF (29.7mg). Very coarse grain. Plag is clear, some slight yellow tint, a few milky grains. Plag is not 100% pure some grains have some darker mafic minerals
11mola104	47.3463	101.778	basalt	I51	E5	8	Ground Mass	B-	Picked GM for TF (8mg). Fine grain gm, most grains have a yellow/green tint. Some plag Phenocrysts
11mola105	47.3505	101.77	basalt	I51	E6	10.4	Ground Mass	C-	Picked GM for TF (10.4mg). Very dark/magnetic coarse. Ran hand mag over MM fraction then picked remainder
11mola106	47.3514	101.779	basalt	I51	E7	7	Ground Mass	B-	Picked GM for TF (7mg. Med grain gm. Some off color grains, slight brow color. Most grains are fairly dark, mafics
11mola107	47.3513	101.779	basalt	I51	E8	5	Ground Mass	B	fine to med GM. Picked gm for TF. Mostly clear/white grains with small mafics. Removed several white chalky brittle grains?
11mola108	47.3448	101.776	basalt	I51	E9	6.7	Ground Mass	C-	med grain GM. Picked for TF (6.7mg). Most grains are discolored, yellow/brown/green. Some chalky brittle grains picked out. Possibly a lot of olivine?
11mola109	47.4484	102.108	basalt	I51	F1	6	Ground Mass	C-	very dark very magnetic GM, Picked for TF
11mola110	47.8361	102.96	basalt	I51	F2	8	Ground Mass	C	Fine grain GM. Picked for TF (8mg). Very magnetic. Could not use pin to pick. Gm is light in color with very fine mafics, likely lots of magnetite. Some olivine phenocrysts. Some grains have small red-brown xtal
11mola111	47.8361	102.96	basalt	I51	F3	6.8	Ground Mass	C	Fine Grain GM. Picked for TF (6.8mg) very magnetic. Hand mag 70% off of LM fraction. Olivine phenocrysts. Some grain have a red tint.
11mola112	47.8781	103.067	basalt	I51	F4	5	Ground Mass	C	Fine to med Grain GM. Picked for TF. Fairly magnetic. Lots of olivine phenocrysts. Some red/brown phenocrysts pyroxenes?
11mopz15	46.3066	99.1264	basalt	I55	E7	3.3	GM	B	Very dark fine grain. Some small plag and olivine phenocrysts (DUPLICATE IN I56)
11mopz16	46.3154	98.8397	basalt	I57	F	20.56	GM	D	Reactive with nitric, Light colored finer grain GM. Opaque grains. Glad and plag likely dominate. Minor pyroxene and oxides. Some grains have a pale green tint-removed
11mopz17b	46.3154	98.8397	basalt	I57	C9	3.4	GM	B+	Med grain GM. Plag and glass are dominant with minor oxides and pyroxene. Salt and pepper appearance. Minor olivine phenocrysts removed.
11mopz17	46.3154	98.8397	basalt	I55	E8	3.44	GM	B+	Med grain GM. Plag and glass are dominant with minor oxides and pyroxene. Salt and pepper appearance. Minor olivine phenocrysts removed.
11mopz18	46.6962	96.5293	basalt	I57	E1	1.41	GM	C-	Most grains discolored. Evidence of alteration. Med to large grains GM. Lots of plag and glass. Oxides and pyroxenes smaller. Some grains have green yellow tint likely abundant olivine.
11mopz19	46.6995	96.5247	basalt	I57	G	28.62	GM	D-	Reactive with nitric. Very dark grm. Mafic minerals abundant. All grains have a red brown discoloration.
11mopz20a	46.7084	96.5467	basalt	I55	E9	3.52	GM	C-	Med grain dark GM. No phenocrysts. All grains have a slight green yellow tint. Possibly abundant small olivine or some slight alteration. Plag, glass, pyroxene and oxides are dominant
11mopz20b	46.7084	96.5467	basalt	I57	E2	2.49	GM	C-	see above, duplicate sample
Altai	46.3728	96.2572	fault rock
11mopz15b	46.3066	99.1264	basalt	I57	D9	2.35	GM	B	Very dark fine grain. Some small plag and olivine phenocrysts (DUPLICATE IN I56)
12MOLA01	47.8774	103.823	Basalt	I58	P7	3.19	GM	C	Med grain. Lots of altered olivine. Most removed. Plag, glass, pyroxene and oxides looked ok
12MOLA02	48.8602	101.755	Basalt	I58	I1	5.81	GM	C+	Coarse grain. Large plag and mafic minerals. Minor olivine. Grains with red/brown discoloration removed.
12MOLA03	48.8602	101.755	Basalt	I58	P9	4.37	GM	D	Med to coarse grain. Plag, glass, mafics. Abundant olivine with signs of alteration. Most olivine removed
12MOLA04	48.86	101.755	Basalt	I58	P1	2.64	GM	C	Med to course grain. Large plag and mafic minerals. Abundant olivine. Large olivine removed. Some grains have red brown tint
12MOLA05	48.8596	101.754	Basalt	I58	K4	3.37	GM	C+	Med grain. Plag, glass mafics all near equal in size and abundance. Some red/brown minerals removed
12MOLA06	48.8593	101.753	Basalt	I58	X1	4.019	GM	C	Med grain, plag, glass, pyroxene all abundant. Some mafic xenocrysts removed. Some grains have red brown color possibly altered olivine.
12MOLA07	48.8592	101.753	Basalt	I58	X7	3	GM	C	Med grain. Plag, glass, mafics, olivine. Large olivine looks clean removed. Some grains have red brown spots possibly devitrified glass.
12MOLA08	48.8285	101.749	Basalt	I58	S4	4.07	GM	B-	Med to coarse grain. Plag and glass abundant with smaller oxides. Clear light grey mineral. Possibly pyroxene or glass?
12MOLA09	48.686	102.742	Basalt	I58	P6	16.26	GM	B	fine grain dark. Some plag phenocrysts left in. Picked for SH. No olivine or significant alteration observed
12MOLA10	48.6297	102.867	Basalt	I58	S2	3.35	GM	B	Fine grain dark. Plag phenocrysts removed. While opaque chalky grains removed.
12MOLA11	48.6297	102.865	Basalt	I58	L1	1.51	GM	B-	Plag dominant, with some glass? Very light color. Some minor mafics. Lots of olivine megacrysts removed
12MOLA12	48.6303	102.865	Basalt
12MOLA13	48.6307	102.865	Basalt	I58	H9	5.31	GM	C+	med to coarse grain. Plag and glass abundant. Some glass may show minor alteration with a red/brown color. Minor oxides and pyroxene. Some clean olivine megacrysts removed.
12MOLA14	48.6658	102.759	Basalt				GM	F	high degree of alteration. Lots of chalky white minerals. All olivine is alters. GM is very fine grain and not distinguishable.
12MOLA15	48.9272	102.752	Basalt	I57	P	2.16	GM	C-	fine grain. Med grey in color. Very brittle. Mineral id difficult. Evidence of alteration. Some grains have red/brown larger xtals.
12MOLA16	48.9972	102.738	Basalt	I58	P5	22.53	GM	B+	Fine grain, med gray. Minor plag phenocrysts. No alteration apparent. Picked for SH
12MOLA17	49.3221	103.078	Basalt	I58	S5	2.56	GM	C	Coarse grain. Brittle. Large plag and glass. Med sized oxides and pyroxene. Some olivine present. Minor alteration. Grains have a yellow/brown tint
12MOLA18	49.3215	103.078	Basalt	I58	O3	20.31	GM	C	Large euhedral plag in fine grain dark Gm. Picked fraction has large plag and fine grain gm. Clean plag without GM was removed.
12MOLA19	49.3209	103.078	Basalt	I58	I4	4.19	GM	C	Very dark glass with plagioclase megacrysts
12MOLA20	49.3204	103.077	Basalt	I58	P8	4.19	GM	B-	Med to coarse grain. Large pag and glass, smaller mafics. Minor olivine.
12MOLA21	50.7868	100.532	Basalt
12MOLA22	50.787	100.532	Basalt	I57	N	2.57	GM	B	large grain light color. Large plag. Abundant glass. Smaller oxides and pyroxene. Larger glass is devitrified. Only clean grains picked.
12MOLA23	50.7873	100.533	Basalt	I58	Z3	3.19	GM	C-	Fine grain. All grains have slight red/brown tint. Large red/brown megacrysts removed possibly altered olivine
12MOLA24	51.2163	100.757	Basalt	I57	I	2.32	GM	C	large chunky grains. Plag, glass, pyroxene and oxides all abundant. Some minor olivine. Minerals are all large. Some white chalky grains removed
12MOLA25	51.2167	100.761	Basalt	I58	Z2	7.48	GM	C	Med grain. Light color. Plag nd glass dominant. Smaller mafics. Some grains have a slight green tint. Possibly small olivine in GM.
12MOLA26	51.2168	100.747	Basalt	I58	H2	6.37	GM	D	Med to coarse grain. Lots of large plag. Discoloration in most grains.
12MOLA27	51.2159	101.778	Basalt	I58	H4	3.65	GM	B	Med grain. Plag, glass, pyroxene and oxides all present. Some grains with large olivine crystals removed. Some minor red brown discoloration in few grains
12MOLA28	50.9985	100.718	Basalt	I58	I8	1.74	GM	D	Fine to med grain. Brittle. Lots of altered olivine in Gm and as phenocrysts
12MOLA29	50.9985	100.718	Basalt	I58	S3	3.77	GM	B	Med grain. Plag, glass larger. Smaller pyx and oxides. Minor olivine and pyroxene phenocrysts removed
12MOLA30	50.9971	100.718	Basalt	I58	H7	2.94	GM	C-	Med grain. Plag, glass, pyroxene all abundant. Many grains show discoloration and evidence of alteration. Possibly abundant altered olivine.
12MOLA31	50.9945	100.712	Basalt	I57	E6	1.47	GM	C-	very brittle. Fine grain light grey gm. Plag, glass, pyx and oxides all small. Larger unidentified pale white yellow mineral in all grains. Best effort to remove.
12MOLA32	50.5493	101.39	Basalt	I58	K5	2.92	GM	C	Very dark Med grain. Plag, glass mafics. Some chalky white brittle grains removed. Few red/brown grains removed. Some altered looking olivine removed.
12MOLA33	50.385	101.39	Basalt	I58	P3	2.45	GM	B	Fine grin dark groundmass with plag phenocrysts
12MOLA34	50.5524	101.39	Basalt	I57	E7	1.46	GM	C	large grain light color g,. Plag and glass dominant and large. Smaller oxides and pyroxene. Pale blue mineral?
12MOLA35	50.5532	101.391	Basalt	I58	O7	2.05	GM	B	Fine grain dark gm. Some plag phenocrysts
12MOLA36	50.5532	101.391	Basalt	I58	O6	6.58	GM	C	Coarse grain. Plag and glass dominant. Small oxides. Abundant olivine phenocrysts removed. Olivine shows slight alteration
12MOLA37	50.5533	101.391	Basalt	I57	E5	3.82	GM	C	Med to coarse grain. Large plag and glass. Some glass my be devitrified. Yellow/red grains removed. Some olivine possible. Smaller oxides and pyroxene
12MOLA38	50.6161	100.716	Basalt	I57	A9	2.41	GM	C-	Light color med grain. Larger plag and glass. Smaller oxides and pyroxene. Lots of olivine. Most grains have a yellow green tint.
12MOLA39	50.6166	100.715	Basalt	I58	K3	1.58	GM	C-	Med grain. Plag and mafics. Abundant olivine removed. Some may be present in GM.
12MOLA40	49.8468	100.052	Basalt	I58	K6	0.79	GM	C-	coarse grain. Glass shards and plag picked with minor small mafics. Lots of large pyroxene and olivine removed
12MOLA41	49.8481	100.052	Basalt	I57	K	2.48	GM	C	very fine grain. Med grey. Mineral id difficult. Some large altered olivine removed. Some white chalky brittle grains also removed.
12MOLA42	49.8464	100.052	Basalt	I58	K1	2.69	GM	B-	Med grain, plag and glass dominant. Smaller mafics. Some altered olivine removed
12MOLA43	51.4387	99.2168	Basalt	I57	A6	2.19	GM	B+	Light color. Med grain. Abundant plag and glass. Smaller less abundant pyroxene and oxides. Some minor small unaltered olivine.
12MOLA44	51.4389	99.2172	Basalt	I58	I6	4.11	GM	B+	Med to fine grain. Plag and glass dominant. Smaller mafics.
12MOLA45	51.4392	99.2173	Basalt	I58	H3	3.76	GM	D	med grain. Lots of brown/red tints in grains. Olivine phenocrysts removed looked clean. Mafics, plag and glass look near equal in size.
12MOLA46	51.4395	99.2176	Basalt	I58	K7	1.44	GM	D	Very coarse grain. Plag xtals and glass shards picked. Abundant large pyroxene crystals removed. Large olivine also removed. Some grains have small red/brown minerals
12MOLA47	51.44	99.2178	Basalt	I58	S1	2.9	GM	B	Med grain. Plag and glass dominant with smaller mafics. Minor olivine with slight alteration removed
12MOLA48	50.1398	99.3206	Basalt	I58	I2	6.4	GM	B+	Fine grain, mineral ID difficult Plag and glass likely dominant with small mafics. Some minor olivine removed.
12MOLA49	50.14	99.3038	Basalt	I58	Z5	3.22	GM	B	med grain plag and glass. Some plag phenocrysts removed.
12MOLA50	50.1414	99.3142	Basalt	I58	P4	18.27	GM	B-	Fine grain dark. Abundant olivine phenocrysts that were slightly altered. Minor plag phenocrysts. Most olivine was removed but some small xtals in picked grains may remain. Watch for recoil redistribution in step heat
12MOLA51	50.1399	99.3187	Basalt	I58	Z9	4.04	GM	C	Med grain gm. Plag and glass dominant. Small oxides and pyroxenes. Abundant altered olivine.
12MOLA52	50.1001	99.3973	Basalt	I58	I9	3.45	GM	B+	Fine grain. Clean looking GM. Minor plag phenocrysts. Few yellow white opaque grains possibly vesicle fill removed.
12MOLA53	50.1009	99.3729	Basalt	I58	L4	2.63	GM	B	Med grain. Light grey. Plag, glass, pyroxene, oxides. Some small olivine. Visible olivine removed.
12MOLA54	50.1041	99.3779	Basalt	I58	H8	3.83	GM	A-	fine grain. Glass and plag dominant. Small mafic minerals can’t ID. Minor plag phenocrysts removed. Few grain with red/discoloration/alteration
12MOLA55	50.1088	99.3779	Basalt	I58	I5	6.63	GM	A	fine grain very dark. Minerals too small to ID in groundmass. Some clean plag and olivine phenocrysts removed.
12MOLA56	49.5402	98.0253	Basalt	I57	E8	2.87	GM	A-	dark fine to med grain gm. Plag, pyroxene oxides. Some large dark glass removed.
12MOLA57	49.5235	98.0273	Basalt	I58	H1	5.13	GM	C+	Med grain very light. Plag and glass dominant very small mafics. Possibly some olivine in GM
12MOLA58	49.5237	98.0282	Basalt	I58	K9	2.42	GM	B-	Dark, fine grain gm. Some grains have red/brown tint. May have altered olivine in GM. Red brown grains removed
12MOLA59	49.525	98.0299	Basalt	I58	S6	5.88	GM	B	med to fine grain dark. Slight green/grey tint. Possibly very small olivine in GM. Some shards of dark/black glass removed
12MOLA60	49.5253	99.0296	Basalt	I58	Z4	4.63	GM	A-	med grain plag and glass dominant. Minor small mafics
12MOLA61	49.5256	98.029	Basalt	I58	X3	2.73	GM	C+	Fine grain dark. Plag, glass, pyroxene and oxides all abundant. Some grains with slightly larger olivine were slightly altered and removed.
12MOLA62	49.4711	97.7823	Basalt	I58	S7	3.62	GM	C+	fine grain very dark. Some altered olivine removed.
12MOLA63	49.4711	97.7823	Basalt	I58	L2	2.1	GM	B	Med to fine grain. Plag and glass dominant with small mafic minerals. Abundant olivine megacrysts removed.
12MOLA64	49.4711	97.7823	Basalt	I58	K2	1.34	GM	C-	Fine grain. Lots of altered olivine removed
12MOLA65	49.1634	97.6578	Basalt	I58	X6	3.38	GM	B	Good clean GM. Med grain plag, glass mafics. Lots of olivine mega cysts removed.
12MOLA66	49.1635	97.6578	Basalt	I58	O4	17.69	GM	A-	Med grain Gm plag nd glass abundant. Small mafics. Some plag phenocrysts.
12MOLA67	49.1636	97.658	Basalt	I58	Z8	7.04	GM	B	Med grain. Plag and glass dominant. Slightly smaller mafics. Minor grains with red/brown minerals possibly altered olivine those grains were removed.
12MOLA68	49.1653	97.6583	Basalt	I57	A8	2.44	GM	B
12MOLA69	47.7549	97.1833	Basalt	I58	O9	2.11	GM	C+	Plag and glass dominant. Opaque plag. Some Pyroxene phenocrysts removed. Few small oxides.
12MOLA70	47.7433	96.9131	Basalt	I58	X2	4.505	GM	B	light color. Med grain plag and glass. Milky appearance. Some large mafic minerals removed. Most mafics are small in size.
12MOLA71	46.5368	98.8325	Basalt	I58	X5	1.64	GM	D	Tan color med grain. Evidence of alteration some grains are tan/brown. Possibly alteration of glass. The most discolored grains were removed.
12MOLA72	46.5406	98.8352	Basalt	I58	L3	2.38	GM	C	Med grain. Plag, glass mafics. Some evidence of small altered olivine. Most removed
12MOLA73	46.547	98.8396	Basalt	I58	H6	3.21	GM	B+	Med to fine grain. Plag and glass abundant with small mafics. Some grains that may have altered olivine removed.
12MOLA74	46.4187	100.852	Basalt	I58	X9	6.58	GM	B	Light grey, med grain. Some clay grains removed. Large clean olivine grains removed.
12MOLA75	46.7271	101.417	Basalt	I58	X8	2.89	GM	B	med grey fine grain. Some grains with red brown coloration removed
12MOLA76	46.727	101.418	Basalt	I58	Z7	4.71	GM	A-	light grey. Glass and plag dominant. Med grain. Small minor pyroxene and oxides.
12MOLA77	46.7237	101.425	Basalt	I58	Z1	4.96	GM	B+	Fine grain. Med grey. Some grains have slight green tint may have olivine in the GM.
12MOLA78	46.7334	101.421	Basalt	I58	K8	2.51	GM	B-	Fine to med grain. Polymineralic. Plag. Glass, mafics. Grains somewhat brittle and were breaking up
12MOLA79	46.7515	101.411	Basalt	I58	P2	1.92	GM	B	Med to fine grain. Plag and glass dominant. Smaller mafic minerals. Some chalky white grains removed. Minor plag phenocrysts
12MOLA80	46.7931	101.768	Basalt	I58	I3	6.13	GM	A	Fine grain. Med to dark grey. Elongate minerals. Plag and mafics abundant. Minor olivine.
12MOLA81	46.793	101.768	Basalt	I58	Z6	3.61	GM	B-	med/fine grain dark gm. Glass, plag, mafic minerals all abundant. Some red brown alteration possibly from altered olivine
12MOLA82	46.7924	101.768	Basalt	I58	I7	2.36	GM	C	light color
12MOLA83	46.7772	101.899	Basalt	I58	X4	2.64	GM	B-	med grain. Glass, plag, pyroxene, oxides. Lots of clean olivine megecrysts removed. Some grains have some red/brown minerals, altered glass?
12MOLA300	49.525	98.0299	Basalt
12MOLA301	46.7924	101.768	Quartzite
12MOLA302	46.7772	101.899	Diabase
12MOBI-05	48.9944	103.245	Basalt	I58	O5	4.26	GM	B+	Med fine grain. Plag, glass, oxides pyroxene Some minor small olivine in GM looks clean. Removed if large
12MOBI-06	48.6243	103.547	Basalt	I58	O8	1.54	GM	C	Coarse grain. Plag and glass dominant with small mafics. Some larger pyroxene phenocrysts removed
12MOBI-07	48.1954	103.921	Basalt	I58	H5	2.75	GM	C-	Coarse grain. Plag/glass with some small oxides picked. Minor discoloration of some GM. Megacrysts of pyroxene and olivine removed.
DS13-01	47.2743	100.03	Basalt
DS13-02	47.4481	100.201	Basalt	I57	A4	2.8	GM	C+	light color. Med to large plag. Lots of glass. Small oxides and maybe pyroxene. Red minerals removed, possibly altered olivine or devitrified glass. More likely the later. Some small minor unaltered olivine. Minor white chalky brittle grains removed, may be amygdaloidal material
DS13-03	47.2691	100.021	Basalt
DS13-04	47.245	100.032	Basalt	I57	A2	2.46	GM	B-	Med to coarse grain. Large plag. Some glass. Smaller oxides and pyx. Minor large pyroxene grains. Some larger dark red brown minarets removed, possibly altered olivine?
DS13-05	47.2691	100.021	Basalt
DS13-06	47.2691	100.021	Basalt
DS13-07	47.2651	99.668	Basalt
DS13-08	47.2099	100.01	Basalt	I57	H1	3.79	GM	B-	coarse grain. Large plag and glass. Some devitrified glass removed. Small oxides and med pyroxene
DS13-09	47.2099	100.01	Basalt	I57	A3	2.41	GM	B	coarse grain. Large plag. Glass abundant. Smaller oxides and pyroxene. Some minor unaltered olivine, still green/yellow
DS13-10	45.7168	101.072	Basalt
DS13-11	45.7168	101.072	Basalt	I57	A7	2.53	GM	B-	dark fine grain. Plag, glass, pyroxene and oxides in somewhat equal abundance. Some larger elongate plag. Minor red/brown minerals removed possibly altered olivine.
DS13-12	46.7999	101.761	Basalt	I57	E9	2.89	GM	D	med grain g,. Red brown color. Glass may be devitrified. Some yellow/red olivine. Plag still looks clean. Small oxides and pyx.
DS13-13	46.7999	101.761	Basalt
DS13-14	46.7999	101.761	Basalt	I57	.Z.	3.6	GM	B-	coarse grain light color. Large glass and plag. Smaller pyroxene and oxides. Large altered olivine removed. Some grains may have small alerted olivine xtals. Olivine is red brown possibly iddingsite
DS13-15	46.7879	101.96	Basalt
DS13-16B	46.7887	101.961	Basalt	I57	A1	2.88	GM	B-	Very dark fine grain gm. A few large plag xtals. Few grains had a red/brown coating. Grains removed
DS13-17	48.0962	100.316	Basalt	I57	.x.	2.67	GM	C	Coarse grain light colored gm. Large plag and glass. Abundant olivine removed. Pyroxene and oxides also large. Some white chalky brittle minerals removed.
DS13-20	48.1843	100.2	Basalt	I57	H2	5.64	GM	A-	Light color med grain gm. Plag and glass dominant. Small oxides and possibly pyroxene
MN080312-1	47.9279	97.1135	Basalt	I57	.A5	1.93	GM	C-	Very dark fine grin. Abundant glass. Mineral id difficult. Some large red/brown altered minerals removed.
KW081012-1	47.1366	99.8633	Basalt	I57	.M.	2.967	GM	B+	med grain, light color. Large plag. Glass also abundant. Minor small oxides, pyroxene and olivine
KW081012-2	47.1346	99.8627	Basalt	I57	L	2.36	GM	C+	med grain light color gm. Larger Plag and glass. Small oxides and pyroxene. Felsic minerals dominant. So grains have a yellow color possibly glass alteration. Minor yellow/green olivine.
KW081012-3	47.138	99.8579	Basalt	I57	.J.	1.679	GM	C	Med grain. Large plag. Abundant glass. Small oxides and pyroxene. Abundant small olivine that is slightly altered. Most grains have some olivine large xtals removed
070613-01	46.8448	101.539	Basalt	I58	L9	5.67
070713-01	46.9674	102.559	Basalt	I58	O1	5.89
SGS-HP01	47.2483	100.05	Basalt	I58	O2	5.02
SHS-HP02	47.1839	100.101	Basalt	I58	L8	7.32
SGS-HP03	47.1773	100.111	Basalt	I58	L7	4.38
SGS-HP04	47.0964	99.9351	Basalt	I58	L6	4.19
SGS-HP05	47.1216	99.9447	Basalt	I58	L5	8.8

## Sheet: DD2
Table DR2. Geochemical Sample Data
	Location			Ar/Ar (Ma) see summary		XRF (% normalized to 100 wt.%)										Original	XRF (ppm)																		ICP-MS (ppm)
SAMPLE	Lat	Long	Elev	Age	2sigma	SiO2	TiO2	Al2O3	FeO*	MnO	MgO	CaO	Na2O	K2O	P2O5	XRF Sum	Ni	Cr	Sc	V	Ba	Rb	Sr	Zr	Y	Nb	Ga	Cu	Zn	Pb	La	Ce	Th	Nd	Th	La	Ce	Pr	Nd	Sm	Eu	Gd	Tb	Dy	Ho	Er	Tm	Yb	Lu
TK-D1	47.2052	100.103	2703	9.78	0.44	48.1199	1.79966	15.7561	9.70153	0.152706	9.9455	9.23098	3.58875	1.22857	0.476315	99.1381	179.7	367.9	25.8	205	420.3	26	711.3	194.8	22.3	35.4	20.9	46.3	92.8	2.5	25.7	52.8	0	26.6	0	28.07	56.63	6.98	28.08	6.08	2.07	5.71	0.86	4.89	0.9	2.33	0.31	1.83	0.28
TK-D2	47.2004	100.106	2825	9.97	0.21	49.4538	1.95377	16.5816	9.60997	0.145306	7.3411	8.19974	4.54279	1.43268	0.739289	99.3765	117	209.3	17.2	180.7	576.1	43	1065	236.4	20.8	45	21.9	23.4	108.5	3.4	39.5	75.9	0.6	32.5	0.6	40.79	80.63	9.64	38.27	7.68	2.54	6.57	0.93	4.91	0.84	1.96	0.25	1.37	0.2
TK-D4	47.2004	100.108	2886			49.7547	1.98226	15.8744	10.3393	0.147283	8.08809	8.15315	4.19221	0.967491	0.501182	99.1017	154.4	262	20.9	176.1	431.3	38.8	764.7	181	21.3	31	21.3	42	106.8	3.1	25.5	50.8	0	28.6
TK-D7	47.2004	100.109	2905			50.0984	1.92919	15.7183	10.1842	0.146004	8.07679	7.77442	3.67034	1.91402	0.48836	99.9836	146.5	244.4	19.1	169.6	450	23.1	735.8	179.3	19.5	29.9	21.8	39.6	106.2	3.5	27.6	49.8	0.4	28.6
TK-D9	47.2004	100.109	2913			49.8544	1.93317	15.6891	10.2362	0.146967	7.97428	7.89192	3.83699	1.93721	0.499852	92.8034	133.6	220.2	17.5	159.3	438.2	20.8	689.4	164.6	18.3	27.7	19.4	37.1	101	1.9	25.7	54.7	0.7	29.6
TK-D10	47.2004	100.109	2922			49.7979	1.94417	15.7643	10.3853	0.145857	7.42653	7.94178	4.04951	2.05546	0.489312	99.9404	134.8	236.7	20.9	170.5	489.7	28	727.4	168.5	19.1	26.1	21.2	36.5	106.8	1.2	23.9	52.5	0	30.4
TK-D12	47.2004	100.11	2929			50.34	1.9975	15.8195	9.98296	0.142665	7.57559	7.82794	3.78583	2.03352	0.494517	99.8914	126.1	229.1	18.3	168.7	455.7	25.5	727.1	159.2	20	28.4	20.5	38.9	108.5	2	23.8	50.3	0	28.3	0	24.4	51.33	6.63	28.25	6.49	2.15	5.81	0.84	4.64	0.83	1.99	0.26	1.45	0.22
TK-D16	47.2004	100.111	2975			50.2531	2.06255	16.1615	10.0402	0.142307	6.83404	7.88227	4.02858	2.05199	0.543489	98.9975	125.8	202	18.8	163.9	407	22.6	720.7	168.3	21	28.9	21.6	38.3	103.6	1.7	26.7	49.2	0	28.4	0	23.98	48.85	6.47	27.8	6.41	2.21	5.93	0.87	4.77	0.84	2.02	0.27	1.53	0.23
TK-D18	47.2004	100.111	2985			48.5448	1.86132	15.8116	10.2865	0.153699	8.95543	8.76648	3.46402	1.69384	0.462219	99.7016	179.9	339	23.9	190.4	378.3	21.5	664.2	159	20.9	26.6	20	46.3	94.7	1.9	20.5	41.7	0	24.3
TK-D19	47.2005	100.112	2997			48.5968	1.8699	15.671	10.2966	0.156457	8.96422	8.6285	3.6831	1.66881	0.464652	99.6379	178.5	322.5	22.5	190.1	370.6	21.7	661.1	161.7	21.9	26.7	18.7	47.4	98.2	1.7	23.5	47.2	0	25.8
TK-D20	47.2005	100.112	3001	8.86	0.18	48.9367	1.87053	15.8467	10.0085	0.15346	8.65324	8.59335	3.78304	1.68723	0.467155	98.8859	164.2	302.8	24.2	186.2	376.1	22.7	663.7	163.3	21	28.2	21.1	47	99.1	1.8	19.5	48.4	0	26.7
TK-D23	47.2004	100.112	3009			49.0185	1.84687	15.7159	10.2996	0.153241	8.46211	8.51399	3.88563	1.64527	0.458933	100.058	161.1	300.8	23.2	184.4	359	20.9	662.8	159.7	21.2	25.3	20.8	45	100.3	1.2	23.5	42.6	0	25.2
TK-D24	47.2004	100.112	3015			49.2384	1.87089	15.9595	10.2229	0.153858	8.31814	8.47399	3.68472	1.61881	0.458852	99.1758	160.6	289.7	23	185	361.8	20.7	662.9	164.4	21.8	26.1	20.3	46	103.3	2.7	21.6	45.7	0	23.1
TK-D25	47.2004	100.112	3020			49.2938	1.85908	15.8561	10.398	0.153873	8.17104	8.37942	3.81933	1.62514	0.444144	100.089	158.3	286.5	21.6	180.6	355.3	21.4	661.6	163.3	21.1	25.9	20.8	44.7	102.7	2.1	24.1	42.6	0	24.5
TK-D26	47.2004	100.112	3026			49.4979	1.88088	16.0445	10.3682	0.156675	7.87966	8.48271	3.65982	1.57869	0.450896	99.1671	158	285	22.8	180.4	353.8	19.8	657.8	160.8	21	26.4	20.4	43.5	106	2.9	23.5	40.9	0	24.8
TK-D27	47.2004	100.112	3030			49.4835	1.89365	15.8305	10.4905	0.155552	7.69824	8.50085	3.96974	1.54253	0.434977	99.2466	140.3	272.8	22.5	185.5	332.7	19.5	641	155.1	20	25.2	20.6	43.5	105.3	2.5	19.5	39	0	22.8	0	19.85	42.2	5.52	23.84	5.71	2.02	5.5	0.83	4.65	0.86	2.11	0.29	1.69	0.25
TK-D31	47.2003	100.113	3061			50.577	2.14091	16.3871	9.62843	0.141716	6.12914	7.9283	4.23047	2.2732	0.563689	99.1913	73.5	187.6	18.5	172.5	482.3	29.2	773.4	208.8	21.4	32.2	22.7	37	103.8	1.4	31.6	58.6	0	29.7
TK-D33	47.2003	100.114	3084			48.9103	1.93014	15.9893	10.1102	0.155994	8.1357	8.74565	3.88229	1.69049	0.449937	99.0806	139.8	290.4	23.7	182.3	381	22	639.4	156.4	21	26.4	20.2	46.1	93.9	2.3	22.3	44.2	0	23.3
TK-D34	47.2003	100.114	3098			49.7863	1.9428	16.0191	10.1212	0.151546	7.51426	8.35893	3.89148	1.78158	0.432878	100.181	108.5	242.7	21.5	176.7	414.6	24.5	669	165.4	22	27.5	21.4	38.8	101.2	2.8	22.5	42.7	0	22.1
TK-D35	47.2003	100.114	3102			49.8219	1.92516	15.8958	10.0792	0.152286	7.76221	8.29669	3.881	1.75536	0.430461	100.232	115.6	239.3	21	173.9	405.4	21.4	650.5	162	21.9	26.3	21.1	38.2	100.2	3.2	20.7	46.9	0	24.7
TK-D37	47.2002	100.114	3106			50.1169	1.95153	16.1171	10.0591	0.150484	7.31553	8.26046	3.88775	1.71682	0.424295	99.1947	105	225.7	22.7	170.6	392.4	22.4	635.9	165.2	22.6	29	19.4	39	100.6	3	21.7	44	2.9	23.5	0	20.85	42.92	5.49	23.74	5.54	1.91	5.37	0.81	4.47	0.83	2.08	0.28	1.65	0.24
TK-D38	47.2002	100.114	3109			50.2856	1.96763	16.374	10.0581	0.152027	7.12884	8.49102	3.98368	1.11841	0.440752	99.1972	101	227.6	22.1	177.7	391.3	20.9	657.3	168.6	22.7	29	19.6	36.7	102.2	3	19.7	39.4	3.1	22.2
TK-D41	47.2002	100.114	3116			49.7919	1.98462	16.28	9.6503	0.149482	6.82405	8.3967	4.00352	2.39086	0.528568	97.8991	90	211.9	20.5	192.1	628.4	36.4	778.8	171.3	21.9	33.5	19.8	35.9	98.5	2.6	30.5	60.5	3.1	30.4
TK-D42	47.2002	100.114	3120			49.8289	1.96425	16.1716	9.81177	0.14999	6.99136	8.36447	3.99031	2.2188	0.508485	98.7362	97	216	20.8	185.2	578.8	33	746	173.3	21.4	33	19.4	38.1	98.8	3.4	31.1	57.6	2.7	28.2
TK-D43	47.2002	100.114	3127	7.97	0.17	48.5342	1.86324	16.084	9.90758	0.153021	8.30413	8.32833	4.35151	1.94203	0.531939	99.7111	152	261.1	21.1	193.2	470.5	40.9	761.7	184.6	21.7	41.7	21.7	43.8	100.3	1.9	31	64.2	3.1	29.7
TK-D45	47.2001	100.115	3156			48.4378	1.97209	16.5444	9.83232	0.157975	8.28189	8.40715	4.00591	1.86686	0.493564	98.3197	132	215.8	20.1	173.7	487.4	28.9	834.4	245.1	20.5	41.4	18.6	36.9	106.1	2.5	28.1	67.9	3.8	33.1	0	31.92	64.12	7.77	31.09	6.61	2.22	5.98	0.88	4.75	0.86	2.04	0.26	1.46	0.22
TK-D46	47.2001	100.116	3175			50.6383	2.21991	16.6584	9.39086	0.136892	5.52891	7.80629	4.42523	2.5376	0.657588	99.3267	52	143.6	17.3	162.8	538.7	32.6	812.8	195.6	20.2	36.4	20.9	32	107.9	3.4	32.7	57.4	3.8	32.1
TK-D48	47.2001	100.116	3186			50.1898	2.05211	16.6683	9.96923	0.148912	6.35273	8.62814	3.88776	1.63507	0.467964	99.5302	71	187.6	21.1	172.5	361.7	22.1	630.3	162.4	23.6	30.2	19.6	39.3	99.4	1.6	22.5	46.7	1.9	25.4
TK-D49	47.2001	100.116	3190			50.3448	2.05348	16.5528	9.94498	0.15326	6.34783	8.82622	3.73563	1.58412	0.456944	98.7284	72	183.9	21.7	171.5	363.5	19.1	652	140.8	23.7	29.1	20.5	39.7	98.3	1.9	25.6	48.8	2.1	25.9	0	21.26	44	5.6	24.14	5.75	2	5.55	0.84	4.8	0.87	2.18	0.29	1.64	0.25
TK-D50	47.2001	100.116	3191	7.96	0.17	50.2405	2.04483	16.4828	9.72019	0.147488	6.51348	8.79535	3.95524	1.63789	0.462219	98.666	71	187.9	21.8	166.7	352.6	23.4	637.5	173.5	22.9	29.6	19.4	39.3	97.9	1	21.3	43.2	2.3	22.5
TK-D52	47.2	100.117	3202			50.3166	2.12085	16.5781	9.81754	0.142714	6.15947	8.6906	3.98434	1.69561	0.494109	98.824	61	130.5	21.1	173.5	360.9	25.3	610.3	177.1	24	29.5	19.5	35.8	98.5	2.1	22.4	50	2.1	27.7
TK-D56	47.2	100.118	3213			50.2893	2.10357	16.6579	9.77566	0.15938	6.13262	8.5861	4.14804	1.66231	0.48507	99.5715	64	157.3	21.4	173.2	367.7	22.4	623.3	175.1	24.2	30.1	22.4	37.7	97.2	2.7	24	45.1	1.5	25.1
TK-D58	47.1999	100.118	3216			50.308	2.12395	16.6921	9.88889	0.15689	6.0311	8.63784	3.95315	1.71555	0.49252	98.8674	60	147.3	21.6	174.8	365.9	23.6	744.6	177.8	24	30.4	20.9	37.3	98.2	2.1	22.1	47.5	2.1	24.1	0	21.14	44.08	5.67	24.21	5.8	2.04	5.67	0.86	4.8	0.9	2.22	0.3	1.73	0.26
TK-D60	47.1999	100.119	3226			50.555	1.74141	17.6758	8.58962	0.130676	5.86588	6.95751	5.37504	2.39083	0.718292	98.105	88	116.6	14.4	132.3	624.8	37.6	1081.1	235.8	16.2	47.2	20.9	32.5	119.6	3.5	38.4	71.1	1.69945	35.5
TK-D62	47.1999	100.119	3227			48.8327	1.91465	16.2874	9.99827	0.153548	8.2152	8.72736	3.6913	1.69535	0.484254	97.7936	140	260.3	23.2	184.4	385.4	23	659.9	172.3	20.8	29.3	17.7	30.5	101.4	0.9	26	45.5	2.9	25.7	0	23.07	46.78	5.85	24.59	5.62	1.95	5.39	0.8	4.49	0.84	2.14	0.29	1.65	0.25
TK-D63	47.2006	100.12	3365	6.27	0.16	48.6078	1.88783	15.9727	10.2211	0.149315	8.2901	8.56967	4.17218	1.66108	0.468199	99.0699	144	253.2	24.1	190.7	375.6	29.3	659.1	171.7	21.9	32.7	17.5	43.9	93.7	2.1	22.9	50.6	2.9	26.3
TK-H1	47.1767	100.111	3188			48.3275	1.87232	16.7157	9.47677	0.160991	8.26451	8.52276	4.3499	1.84136	0.468149	99.2974	133	200	21.9	200.2	492.3	38.1	842.6	224.2	23.5	42.2	18.7	24.1	101.5	0.4	29.6	63	3.9	31.2
TK-X1 dike	47.2005	100.112	3026			50.7381	1.6494	17.8165	8.96371	0.157143	5.08963	6.45481	5.72643	2.80184	0.60246	98.9227	69	93.3	11.1	118.7	642.9	46.9	1113.5	332.1	19.9	63.3	23.2	24.7	131	3.8	47.1	93.3	5.3	40.2
TK-X2 dike	47.2001	100.116	3175			51.4031	1.66516	17.4046	9.00867	0.148618	5.73305	7.80158	3.69828	2.51154	0.625443	96.1235	89	91.9	14.6	136.9	592.8	43.6	1053.1	274.5	21.4	56.1	20.9	31.5	107.6	4.1	38.6	83.3	4.9	33.8
TK-X4 dike	47.1757	100.111	3247			49.2112	1.92009	16.919	9.64348	0.157867	7.03673	7.96109	4.49285	2.12539	0.532249	98.9124	108	166.8	18.1	161.5	524	34.9	905.3	255.6	20.8	47.4	21.8	38.1	113.9	2.4	32.6	73.5	4.4	34.6
E-A1	47.0409	99.7696	2410			48.2796	1.75796	16.6504	9.31248	0.15253	9.09311	8.86522	3.91265	1.48832	0.487654	100.852	159.9	261	24	211.3	452.8	19.2	905.8	163.8	19.3	24	19.9	44.1	94.6	2.6	22.1	54.5	0	28.3	0	25.57	53.41	6.76	27.81	5.95	2.02	5.31	0.79	4.29	0.8	2.02	0.28	1.64	0.25
E-A3	47.0436	99.7668	2462			48.2856	2.00823	16.2418	9.91618	0.158365	8.88886	9.10739	4.04434	0.812999	0.536311	99.0936	151.4	324.2	24.4	203	450.5	15.1	818.4	168.7	21.5	27.4	21	38.3	91.5	1.9	28.2	58.5	0	28.6	0	26.06	54.4	6.87	28.39	6.24	2.17	5.77	0.87	4.84	0.9	2.23	0.31	1.84	0.28
E-A7	47.0446	99.7675	2507			49.4246	2.1049	17.2148	9.81881	0.153509	6.20628	8.63736	4.29467	1.62669	0.518351	98.7305	48	68.4	20.2	184.8	396.8	21.2	749	176	21.9	27.3	21.1	33	100.1	1.8	22.2	46.7	0	28.1
E-A8	47.0449	99.7678	2522			49.4688	2.05437	17.0995	9.93608	0.152156	6.21555	8.56244	4.31901	1.67911	0.513035	98.8588	49	91.9	21.4	179.5	403.2	21.8	730.5	182.6	21.4	26.2	21.8	30.9	101.9	2.2	27.1	52.3	0	27.1	0	24.61	51.64	6.59	27.58	6.26	2.17	5.91	0.9	5	0.94	2.3	0.31	1.87	0.28
E-B4	47.0729	99.6989	2300			47.8754	1.70279	16.254	9.5094	0.160391	9.83912	9.65933	3.35731	1.25654	0.385644	98.3784	172.1	326.9	29.8	222.2	353.8	18.9	697.2	157.5	21.8	23.4	18.1	46.4	81.4	2.7	20.7	46.7	0	23.7	0	21.73	45.74	5.8	23.94	5.39	1.83	5.08	0.8	4.71	0.91	2.38	0.34	2.02	0.31
E-C1	47.3004	99.7377	2321			49.5437	1.88764	17.2706	9.62576	0.148477	6.31022	7.58243	4.83031	2.07554	0.725282	99.8673	84.5	129.6	15.2	146.9	619.5	31.4	1208.9	196.7	20.1	37.6	22.2	26.5	104	5.1	36.3	69.7	0	33.7
E-D1	47.0375	99.8271	3126			47.7568	2.23941	16.4895	10.0373	0.14393	8.51869	8.71011	4.14703	1.41871	0.538512	99.5967	141.4	282.2	21.3	210	493	19.1	1012.8	152.6	19.1	27	20.3	39.3	96	2.2	23.8	50	0	29.5	0	24.98	52.82	6.78	28.33	6.17	2.11	5.6	0.79	4.21	0.77	1.8	0.25	1.42	0.21
E-E2	47.1078	99.6847	2201			48.4569	2.04224	16.5276	10.244	0.158077	7.27703	8.81578	4.08693	1.83912	0.552274	98.4583	105.4	174.5	19.8	170.5	464.7	26.2	749.7	195.3	21	31.6	21.1	33.8	98.6	2.1	28.2	60.9	0	31.6	0	27.06	55.81	6.94	28.45	6.29	2.14	5.81	0.87	4.8	0.87	2.08	0.28	1.66	0.25
E-E3 dike	47.1092	99.6855	2207			49.3002	1.79619	16.1465	9.82822	0.156443	8.41591	8.38107	3.94955	1.56187	0.464005	98.9751	142	233.7	23.2	167.8	406.6	21	676.4	173.8	21.3	27.3	21	38.5	95.1	3.6	23.9	41.9	0	23.8	0	22.71	46.75	5.9	24.66	5.57	1.95	5.13	0.8	4.52	0.83	2.09	0.28	1.67	0.25
E-E4	47.1031	99.6968	2274			47.1972	1.82945	16.1713	9.70612	0.161774	10.2435	9.72142	3.33827	1.20225	0.42863	99.6455	192.3	348.1	28.7	224.9	337	16.4	801.7	150.1	22.9	23	17.2	40.5	83.5	2	22.5	42.5	0	23.5	0	21.83	46.35	5.91	24.72	5.55	1.92	5.32	0.82	4.68	0.9	2.32	0.33	1.93	0.3
E-E8	47.1067	99.689	2258			49.3112	1.94755	16.3178	10.1285	0.160342	7.81772	8.24487	4.02512	1.51952	0.527352	99.0818	125.1	204.3	22.9	187.5	447.4	20.5	724.1	190.2	21.7	31.6	18.9	38	100.2	2	27.6	53.8	0.9	26	0.9	25.73	52.95	6.66	27.71	6.18	2.11	5.74	0.87	4.83	0.88	2.16	0.29	1.69	0.25
E-F2	47.1924	99.6475	2185			49.5584	1.99762	16.2362	9.84337	0.153798	7.37771	8.75518	3.86681	1.76093	0.44992	99.6177	89	229.6	22.7	180.3	402.3	22.9	658.5	163.3	21.2	27.1	20.2	39.1	98.2	3.2	20.2	44	1.2	25.1	1.2	21.7	45	5.72	24.43	5.67	2.03	5.49	0.84	4.74	0.87	2.11	0.28	1.66	0.25
E-F5	47.1924	99.6475	2190			49.6387	1.98099	16.1701	10.0213	0.152941	7.53894	8.89684	3.24475	1.90858	0.446868	98.8748	95.1	234.7	21.4	173.2	400.5	23	669.1	160.8	21.9	27	20.9	40.7	97.8	3.2	22.6	49.9	0	23.2	0	21.59	44.33	5.68	24.02	5.62	1.98	5.42	0.83	4.61	0.86	2.07	0.28	1.63	0.24
E-F6	47.1924	99.6475	2193			50.1902	2.01675	16.0653	9.45025	0.148109	7.27039	8.56261	3.50845	2.27484	0.513087	97.4688	83	233.2	19.7	172.1	574.7	32.7	723	166.8	19.7	28.9	22.5	32.4	96.1	2.7	27.4	55.2	0	29.9
E-F8	47.1924	99.6475	2199			50.0544	2.02007	16.071	9.44331	0.147555	7.24336	8.22003	4.06784	2.22094	0.511529	99.5154	86.4	243.7	19.9	175	581.5	32.2	729.8	169	19.9	30.9	20.8	31.4	98.2	3.6	29	53.3	2.1	29.3	2.1	27.11	55.64	7.02	29.12	6.51	2.18	5.83	0.86	4.68	0.85	2.01	0.27	1.5	0.22
E-G1	47.2096	99.6663	2210			49.6227	1.89062	15.5795	10.009	0.150413	8.52759	8.46437	3.48297	1.82635	0.446423	99.2265	151.2	259.2	22.3	177	427.1	23.9	662.6	160.7	21	25.3	20.5	41.6	101.3	2.2	24.4	48.4	0	26.8
E-H2	47.2099	99.6697	2215			49.0826	2.01913	15.9133	10.0798	0.15629	8.39581	8.7204	3.5165	1.63747	0.478685	100.352	140.1	279.2	21.8	178.7	355.1	17.8	696.7	161.8	21.9	25.8	19.4	47.2	101.8	3.3	21.8	48.4	0	26.3	0	21.32	44.52	5.76	24.67	5.84	2.05	5.57	0.85	4.77	0.89	2.17	0.29	1.68	0.25
E-H8	47.2105	99.6712	2245			49.0345	2.03828	16.1158	10.1127	0.158162	7.88464	8.82379	3.58397	1.76514	0.483062	100.277	114	254.9	21.2	185.4	379.5	18.6	748.2	166.9	21.6	26.8	22.4	46.2	98	2.3	21.5	47.3	0	27.8
E-H9	47.2106	99.6714	2250			48.9205	1.99833	15.7544	10.0268	0.157574	8.59436	9.25073	2.89044	1.92583	0.481022	98.906	135.6	251.9	21.4	177.7	381.1	21.4	1123.2	166.7	21	26.9	21	44.7	97.7	1.3	23.4	42.5	0	22.6	0	22.04	45.95	5.89	25.14	5.82	2.02	5.46	0.84	4.66	0.86	2.05	0.28	1.6	0.24
E-H14	47.2113	99.6729	2283			49.0285	2.03267	16.1464	10.1037	0.158662	7.89909	8.8051	3.58312	1.76033	0.482426	100.011	114.9	251.4	22.5	181.8	371.9	19.4	745.9	167.7	21.9	26.3	20.6	47.2	99.4	1.1	26	48	0	25.8
E-H18	47.2115	99.6733	2290			49.5064	2.18309	16.4146	9.55081	0.145845	6.65302	8.52284	4.14832	2.29019	0.584802	98.447	71.8	185	19.1	174.6	519.6	27.4	898	181.7	20.6	31.3	21	40.6	97.9	1.8	29.9	57.4	0	30.9	0	27.34	57	7.27	30.69	6.72	2.31	6.15	0.9	4.76	0.86	2.01	0.27	1.49	0.22
[truncated: 13 more columns]

## Sheet: DR3
Table DR3. Ar/Ar Geochronology Data
LU#	Sample Name	Irradition	Analysis Type	36Ar(a) [fA]	37Ar(ca) [fA]	38Ar(cl) [fA]	39Ar(k) [fA]	40Ar(r) [fA]	Age (Ma)	± 1σ (Ma)	40Ar(r)	39Ar(k)	K/Ca	± 1σ	Lat	Long	Base Elev of Flow	Flow Thickness	Location Name	Flow # (1 is base of section)	Section total thickness	Top of section elev above river	Incision rate m/Ma		additional info
											(%)	(%)
LU2015-001	070613-1	I58	laser fusion	0.570999	498.531	0.523988	713.355	590.69	3.05175	0.05577	77.6239	2.30676	0.615292	0.0126933	46.8453	101.54	2027	3	Upper Orkhon Gol valley	1	6	2086			Two 3-m thick flows separated by 53 m; we dated basal flow.
LU2016-001	070713-1	I58	laser fusion	0.541372	698.88	0.596175	786.226	1621.39	7.59084	0.112795	90.9317	2.54241	0.483742	0.00997352	46.9674	102.559	1583	6	Lower Orkhon Gol valley	3	6	1589
LU1859-001	11MOBI01	I57	laser fusion	2.84051	367.386	7.22104	244.103	957.47	9.44367	0.148843	52.9501	1.96479	0.285706	0.00572974	47.2004	100.109
LU1860-001	11MOBI02	I57	laser fusion	0.337126	299.802	3.84435	169.516	665.638	9.454	0.168922	86.0909	1.36444	0.243133	0.00487675	47.2003	100.111
LU1830-001	11MOBI03	I57	laser fusion	0.980725	470.848	11.9208	241.437	872.69	8.70431	0.226719	74.4253	1.94333	0.220492	0.00443334	47.2003	100.111
LU1831-001	11MOBI04	I57	laser fusion	0.181581	286.265	4.66491	103.204	391.153	9.12591	0.449062	87.0963	0.830694	0.155024	0.00312301	47.2	100.106
LU1844-001	11MOBI05	I57	laser fusion	1.44842	307.055	5.22791	137.922	538.291	9.39678	0.177428	55.3383	1.11013	0.193146	0.00387306	47.205	100.103
LU1802-SH	11MOKW05	I57	Step Heat	7.24642	1625.31	10.5248	742.363	1319.52	4.22444	0.139869	plateau age		0.0232903	0.00215274	47.1463	99.8914	3234		Eginn Dava top	20 of 20	719				highest flow in immediate vicinity, plateau age
LU1854-001	11MOKW06	I57	laser fusion	0.435199	251.773	1.50586	156	256.389	3.96298	0.122185	65.3587	1.25564	0.26643	0.00534339	47.1849	99.8764	2756		Eginn Dava top	15 of 20					highest flow on hanginwall (down) side of Egiin Davaa fault - could help constrain timing and amount of throw on fault. Initiation of movement on fault must be younger than age of this basalt flow, and this flow may have been higher in elevation than 11MOKW05 initially.
LU1855-001	11MOKW07	I57	laser fusion	1.02921	283.105	19.3251	254.795	2051.82	19.3352	0.281394	86.653	2.05085	0.387001	0.0077631	47.277	101.143	2058	2	Pass south of Bulgan	20 of ~20	~40	2058			top most flow; collected to constrain long-term valley incision rate - full section of flows not measured.
LU1835-001	11MOLA01	I57	laser fusion	0.620459	305.67	0.569278	243.272	1388.22	13.7228	0.208583	87.7035	1.9581	0.342222	0.00686479	47.5216	100.607	2070		Pass to Chulute	1 of 1
LU1841-001	11MOLA03	I57	laser fusion	1.7964	383.668	3.48064	187.597	496.304	6.37498	0.127094	47.9116	1.50997	0.210252	0.00421581	47.1996	100.12	3344		Keck Cirque
LU1840-001	11MOLA04	I57	laser fusion	0.649622	277.168	4.25219	124.93	334.77	6.45697	0.166129	62.8619	1.00556	0.193817	0.00388654	47.1998	100.12	3312	5	Keck Cirque
LU1837-001	11MOLA05	I57	laser fusion	0.151075	43.3326	0.764794	15.6346	41.6129	6.4135	1.10184	47.8407	0.125843	0.155146	0.00326772	47.1992	100.118	3281	10	Keck Cirque
LU1838-001	11MOLA06	I57	laser fusion	3.68433	521.28	1.83962	259.452	730.046	6.77958	0.119178	39.8752	2.08833	0.21402	0.00429365	47.1998	100.117	3246		Keck Cirque
LU1834-001	11MOLA07	I57	laser fusion	1.26067	400.312	3.08411	202.402	657.83	7.82855	0.141985	63.2683	1.62914	0.217413	0.00436128	47.2	100.116	3200		Keck Cirque
LU1832-001	11MOLA08	I57	laser fusion	1.68909	332.069	13.6734	189.222	648.527	8.25445	0.154906	56.1253	1.52305	0.245026	0.00491753	47.2001	100.115	3182		Keck Cirque
LU1811-001	11MOLA09	I57	laser fusion	0.842296	350.04	0.876869	241.927	843.4	8.39585	0.139425	76.479	1.94727	0.297191	0.00596093	47.2002	100.114	3154		Keck Cirque
LU1842-001	11MOLA10	I57	laser fusion	0.867112	433.802	3.22036	238.861	801.307	8.07993	0.13378	74.982	1.92259	0.236767	0.00474733	47.3338	100.196	3118		Keck Cirque
LU1627-001	11MOLA100	I52	laser fusion	1.30855	536.815	0.097906	1387.46	425.923	1.40701	0.088608	52.3604	4.80316	1.11138	0.0223307	47.2046	101.044	1992	5	Tsugalt Valley	1 of 1	5	5	3.55363
LU1628-001	11MOLA101	I52	laser fusion	1.17991	715.225	0.160397	918.5	3998.72	19.8523	0.30947	91.9681	3.1797	0.552211	0.0110954	47.2973	101.125	2118	3	Ulaan	2 of 2	121
LU1629-001	11MOLA103	I52	laser fusion	0.612755	948.866	0.301834	290.602	1221.39	19.1694	0.712376	87.0782	1.00602	0.131693	0.00264795	47.2902	101.126	2000	4	Ulaan	1 of 2
LU1630-001	11MOLA104	I52	laser fusion	3.20152	653.38	0	489.895	1986.05	18.4935	0.269045	67.7278	1.69594	0.322408	0.00738093	47.3463	101.778	1780	2	south of Tsenher	4 of 5
LU1631-001	11MOLA105	I52	laser fusion	0.76323	732.61	1.344	638.566	2546.31	18.1918	0.261009	91.8505	2.21062	0.374802	0.00865561	47.3505	101.77	1756	3	south of Tsenher	3 of 5
LU1632-001	11MOLA106	I52	laser fusion	0.411274	353.917	0.876931	444.382	1775.85	18.2312	0.264992	93.5814	1.53838	0.539913	0.0141517	47.3514	101.779	1745	1	south of Tsenher	2 of 5
LU1633-001	11MOLA107	I52	laser fusion	3.36734	760.785	0.79604	565.876	2226.01	17.9475	0.393916	69.1006	1.95897	0.319836	0.00642892	47.3513	101.779	1717	2	south of Tsenher	1 of 5
LU1634-001	11MOLA108	I52	laser fusion	5.40642	485.253	0.322514	457.011	1823.04	18.1986	0.379056	53.291	1.5821	0.404974	0.00813986	47.3448	101.776	1800	2	south of Tsenher	5 of 5	85
LU1635-001	11MOLA109	I52	laser fusion	0.512405	391.812	0.2725	996.691	1397.08	6.41571	0.176142	90.1863	3.45039	1.09383	0.0220076	47.4484	102.108	1524	5	Ogiinuur Road
LU1636-001	11MOLA110	I52	laser fusion	0.951922	390.484	0	1720.59	5150.23	13.673	0.206455	94.8028	5.9564	1.89471	0.0380792	47.8361	102.96	1319	2	Ogii Nuur flows	1 of 2
LU1637-001	11MOLA111	I52	laser fusion	2.51354	305.635	0.00763368	1129.11	3450.73	13.959	0.198654	82.2745	3.90879	1.58855	0.0437283	47.8361	102.96	1321	2	Ogii Nuur flows	2 of 2
LU1638-001	11MOLA112	I52	laser fusion	1.57657	432.494	0.400698	1342.92	4634.1	15.7535	0.2471	90.8505	4.64898	1.33518	0.0268567	47.8781	103.067	1359	5	cone near Ogii nuur	1 of 1	100
LU1839-001	11MOLA13	I57	laser fusion	0.27336	419.791	1.27839	251.672	835.28	7.99394	0.130215	90.0315	2.02571	0.257792	0.00516892	47.47	100.246	2157	5	South of Chulute	1 of 1
LU1833-001	11MOLA14	I57	laser fusion	0.132525	292.79	0.67878	159.888	496.91	7.48663	0.192422	91.5665	1.28694	0.234816	0.00471023	47.4905	100.229	2124	7	Chulute Nose	2 of 4
LU1843-001	11MOLA15	I57	laser fusion	0.77927	249.989	8.11719	145.745	480.948	7.94828	0.159818	66.9831	1.1731	0.250693	0.00502691	47.4905	100.229	2137	5	Chulute Nose	4 of 4
LU1722-001	11MOLA16	I55	laser fusion	1.22773	394.106	4.11637	311.59	859.071	8.66022	0.138524	69.7366	3.02112	0.339968	0.00056434	47.4905	100.229	2132	9	Chulute Nose	3 of 4
LU1723-001	11MOLA17	I55	laser fusion	0.284097	328.728	1.85081	288.266	776.07	8.45698	0.190833	89.2738	2.79498	0.377073	0.00756793	47.4905	100.229	2121	3	Chulute Nose	1 of 4	21
LU1724-001	11MOLA18	I55	laser fusion	0.294949	250.56	1.86674	223.907	637.227	8.93872	0.229994	87.0976	2.17097	0.38426	0.0077145	47.4452	100.215	2107	3	Chulute Nose (upper)	1 of 7
LU1725-001	11MOLA19	I55	laser fusion	0.520269	608.645	12.9191	224.36	637.918	8.93039	0.227793	79.8464	2.17535	0.158507	0.00318186	47.4452	100.215	2110	8	Chulute Nose (upper)	2 of 7
LU1726-001	11MOLA20	I55	laser fusion	2.99342	312.303	0.821737	288.294	825.193	8.99009	0.196125	48.0012	2.79525	0.396942	0.00796698	47.4454	100.214	2118	10	Chulute Nose (upper)	4 of 7
LU1727-001	11MOLA21	I55	laser fusion	0.349861	177.217	1.20325	158.239	442.861	8.79065	0.298131	80.3176	1.53426	0.383952	0.00771354	47.4443	100.214	2136	10	Chulute Nose (upper)	6 of 7
LU1728-001	11MOLA22	I55	laser fusion	0.209556	289.365	0.622086	325.856	917.779	8.84653	0.184081	92.6755	3.15945	0.484227	0.00971795	47.4438	100.214	2146	16	Chulute Nose (upper)	7 of 7	55
LU1729-001	11MOLA23	I55	laser fusion	0.39839	261.428	0.350156	295.797	915.631	9.72037	0.199178	87.788	2.868	0.48653	0.00976492	47.4422	100.195	2185	10	west bank of Chulute	3 of 3
LU1730-001	11MOLA24	I55	laser fusion	0.219698	206.636	1.56713	160.906	486.86	9.50195	0.301408	87.4021	1.56012	0.334838	0.00672615	47.4422	100.195	2172	6	west bank of Chulute	2 of 3
LU1731-001	11MOLA25	I55	laser fusion	0.132343	196.31	1.02693	138.732	430.827	9.75164	0.212516	90.8021	1.34512	0.30388	0.00611502	47.4261	100.197	2144	19	west bank of Chulute	1 of 3	91	101	10.3906
LU1732-001	11MOLA28	I55	laser fusion	0.794141	282.847	4.95162	146.495	119.404	2.56456	0.158804	33.2726	1.42039	0.22271	0.00447624	47.1092	99.6855	2201	40	Eginn Dava Cinder Cone	1 of 1	40
LU1733-001	11MOLA29	I55	laser fusion	0.468326	403.737	3.07144	186.735	442.578	7.44722	0.161104	75.3857	1.81055	0.198882	0.00399411	47.193	99.6482	2189	3	Baydrag Gol bank	1 of 4
LU1734-001	11MOLA30	I55	laser fusion	0.140772	237.391	0.216513	118.191	281.38	7.48059	0.216137	86.0878	1.14596	0.214086	0.00430642	47.193	99.6482	2192	3	Baydrag Gol bank	2 of 4
LU1735-001	11MOLA31	I55	laser fusion	0.184963	305.075	0.178808	246.337	595.868	7.60032	0.136297	90.4742	2.38844	0.347209	0.0069742	47.193	99.6482	2195	4	Baydrag Gol bank	3 of 4
LU1736-001	11MOLA32	I55	laser fusion	0.204097	295.823	0.751384	267.783	645.765	7.57713	0.133077	90.3341	2.59638	0.389243	0.00781866	47.193	99.6482	2199	9	Baydrag Gol bank	4 of 4	19	22	2.90347
LU1737-001	11MOLA33	I55	laser fusion	0.764491	350.77	6.36958	134.942	152.698	3.55943	0.165546	39.8652	1.30838	0.165422	0.00332405	47.1362	99.7295	2255	5	Jargalant bridge	1 of 2
LU1738-001	11MOLA34	I55	laser fusion	0.358796	316.48	7.46151	153.362	127.312	2.61191	0.145585	53.4091	1.48697	0.208373	0.004187	47.1389	99.7438	2294	8	Jargalant bridge	2 of 2	47	50	19.143
LU1739-001	11MOLA35	I55	laser fusion	0.305217	545.071	3.12196	194.956	269.422	4.34609	0.12732	73.6096	1.89026	0.153798	0.00308791	47.2056	99.8798	2515	4	Egiin Dava top	1 of 20
LU1740-001	11MOLA36	I55	laser fusion	1.79487	513.881	2.19757	154.73	229.538	4.66491	0.159637	30.0049	1.50024	0.129474	0.00260026	47.2031	99.8824	2561	10	Egiin Dava top	4 of 20
LU1741-001	11MOLA37	I55	laser fusion	1.15661	485.471	5.08251	143.039	235.602	5.17876	0.163154	40.4762	1.38689	0.126695	0.00254485	47.203	99.8842	2586	5	Egiin Dava top	5 0f 20
LU1742-001	11MOLA38	I55	laser fusion	0.421935	341.506	5.93424	308.521	899.696	9.15872	0.1463	86.969	2.99136	0.388468	0.00780075	47.2355	99.6735	2263	41	Baydrag Gol upper	3 of 3
LU1743-001	11MOLA39	I55	laser fusion	0.305105	372.193	1.13731	274.557	807.21	9.23355	0.148888	89.0591	2.66206	0.3172	0.00636683	47.2351	99.6726	2259	4	Baydrag Gol upper	2 of 3
LU1744-001	11MOLA40	I55	laser fusion	0.212924	410.272	0.96883	274.151	793.972	9.09592	0.149555	91.6954	2.65812	0.287333	0.00576696	47.2346	99.6722	2250	9	Baydrag Gol upper	1 of 3	54	84	9.17159
LU1745-001	11MOLA42a	I55	laser fusion	21.4634	313.518	0.922811	292.622	1044.84	11.2078	0.17786	14.1254	2.83721	0.40134	0.0080565	47.3331	100.107	2355	5	Chulute upstream	6 of 11
LU1746-001	11MOLA42b	I55	laser fusion	21.1679	342.548	0.970505	257.029	918.502	11.2169	0.189679	12.7889	2.49211	0.322648	0.00647652	47.3332	100.107	2355	5	Chulute upstream	6 of 11
LU1747-001	11MOLA43	I55	laser fusion	0.156556	241.64	0.641406	168.065	507.261	9.47851	0.178166	90.7405	1.62953	0.299073	0.00600557	47.3332	100.108	2378	12	Chulute upstream	8 of 11
LU1748-001	11MOLA44	I55	laser fusion	0.195676	298.485	1.71119	241.229	691.789	9.00711	0.153144	91.3251	2.33892	0.347517	0.00697627	47.334	100.108	2400	3	Chulute upstream	9 of 11
LU1749-001	11MOLA45	I55	laser fusion	0.27863	543.123	0.950859	234.477	605.823	8.11696	0.145339	87.066	2.27345	0.18564	0.00372591	47.3327	100.11	2415	11	Chulute upstream	11 of 11	190	190	23.4078
LU1750-001	11MOLA46	I55	laser fusion	0.47834	533.384	2.88106	186.581	483.999	8.14933	0.159242	76.6512	1.80905	0.150416	0.00301913	47.2705	100.014	2478	5	Keck Camp	8 of 11
LU1751-001	11MOLA47	I55	laser fusion	0.102637	199.283	0.409836	142.554	331.962	7.31732	0.178166	90.4709	1.38218	0.307595	0.00617912	47.2715	100.014	2497	7	Keck Camp	9 of 11
LU1752-001	11MOLA48	I55	laser fusion	0.476506	210.569	2.66203	161.558	341.421	6.64183	0.159429	70.0392	1.56644	0.329915	0.00662672	47.2698	100.009	2505	8	Keck Camp	10 of 11
LU1753-001	11MOLA49	I55	laser fusion	0.893084	375.422	6.26399	176.126	381.375	6.80513	0.14781	58.5825	1.70768	0.20173	0.00404971	47.2695	100.009	2523	4	Keck Camp	11 of 11	136
LU1754-001	11MOLA50	I55	laser fusion	0.804602	362.636	3.40861	157.57	300.332	5.99143	0.153452	55.2895	1.52777	0.186841	0.00375099	47.2071	100.121	3350	5	Keck Cirque	top
LU1755-001	11MOLA51	I55	laser fusion	0.130737	221.767	24.5532	123.695	551.647	13.9879	0.274925	92.8253	1.19932	0.239841	0.00481612	47.5751	101.139	1650	16	Tayhar Chulu	1 of 8
LU1756-001	11MOLA52	I55	laser fusion	2.65385	455.913	0.680186	280.635	1245.69	13.9225	0.210784	61.0941	2.72099	0.264684	0.00531228	47.5752	101.138	1666	12	Tayhar Chulu	2 of 8
LU1757-001	11MOLA53	I55	laser fusion	0.303309	352.928	0.256626	170.926	737.883	13.5417	0.22646	88.5796	1.65727	0.208253	0.00417923	47.5752	101.138	1678	5	Tayhar Chulu	3 of 8
LU1758-001	11MOLA54	I55	laser fusion	0.534122	340.559	0.189672	302.627	1312.54	13.6048	0.204685	88.6785	2.93423	0.382107	0.00766806	47.575	101.156	1698	2	Tayhar Chulu	6 of 8
LU1759-001	11MOLA55	I55	laser fusion	0.156364	310.655	0.674294	171.058	757.014	13.8809	0.236506	93.6076	1.65855	0.236774	0.00475181	47.5749	101.148	1704	7	Tayhar Chulu	8 of 8	61	63	4.53863
LU1760-001	11MOLA56	I55	laser fusion	0.297771	336.596	0.672283	164.405	750.86	14.3234	0.244607	88.9527	1.59405	0.210027	0.0042161	47.4691	100.894	1863	3	upstream Ihtamir	1 of 3
LU1761-001	11MOLA57	I55	laser fusion	0.958054	668.954	108.533	487.031	2097.26	13.5081	0.196567	87.5342	4.72217	0.313061	0.00628274	47.4683	100.895	1878	10	upstream Ihtamir	2 of 3
LU1763-001	11MOLA58	I55	laser fusion	0.195741	488.628	1.2268	265.647	1162.42	13.7257	0.210158	94.5417	2.57567	0.233774	0.00469198	47.4668	100.894	1922	5	upstream Ihtamir	3 of 3	127	144	10.4913
LU1590-001	11MOLA59	I52	laser fusion	1.0986	633.236	0.142656	946.977	610.491	2.95353	0.152191	65.244	3.27829	0.643047	0.00123301	46.8568	101.556	2102	13	inset Orkhon headwaters	4 of 6
LU1592-001	11mola61	I52	laser fusion	0.502067	716.89	0.00452479	1148.39	1036.47	4.13358	0.121866	87.4267	3.97554	0.688819	0.0138376	46.8582	101.563	2024	8	inset Orkhon headwaters	2 of 6
LU1593-001	11MOLA62	I52	laser fusion	0.577961	520.045	0.0319855	237.764	156.453	3.0146	0.141263	47.7886	0.823102	0.196596	0.00476358	46.858	101.563	2054	10	inset Orkhon headwaters	3 of 6
LU1594-001	11MOLA63	I52	laser fusion	0.410148	678.196	0.0167026	1318.25	824.524	2.8656	0.103544	87.1108	4.56359	0.83582	0.0167915	46.8652	101.559	2012	12	inset Orkhon headwaters	1 of 6
LU1595-001	11MOLA64	I52	laser fusion	1.13467	628.151	0.00462115	1109.09	682.977	2.82134	0.12805	67.028	3.8395	0.759228	0.0152529	46.859	101.557	2105	5	inset Orkhon headwaters	6 of 6	98	100	35.4442
LU1596-001	11MOLA65	I52	laser fusion	1.67835	462.787	0.123646	205.391	136.158	3.03706	0.190777	21.536	0.71103	0.190839	0.00465074	46.9008	101.504	2087	2	Orkhon headwaters upstream	1 of 1
LU1597-001	11MOLA66	I52	laser fusion	0.371528	656.155	0.0751166	726.956	3547.72	22.2394	0.363009	96.9867	2.51661	0.476398	0.00957149	46.9035	101.517	2210	5	Orkhon headwaters hill top	1 of 9
LU1598-001	11MOLA67	I52	laser fusion	0.365252	1133.13	1.65934	836.595	3944.57	21.491	0.34171	97.3245	2.89616	0.317472	0.00637723	46.9117	101.533	2267	5	Orkhon headwaters hill top	2 of 9
LU1599-001	11MOLA68	I52	laser fusion	0.889073	734.849	0.0975418	709.37	3364.03	21.6145	0.350392	92.7451	2.45573	0.415091	0.00833958	46.9119	101.531	2333	4	Orkhon headwaters hill top	4 of 9
LU1601-001	11mola70	I52	laser fusion	0.303223	659.395	0.262153	437.715	1947.71	20.2885	0.405456	95.5896	1.5153	0.28544	0.00573552	46.9138	101.524	2403	2	Orkhon headwaters hill top	9 of 9	318	335	19.377
LU1602-001	11MOLA71	I52	laser fusion	0.716015	641.321	0.321287	457.546	2072.31	20.6487	0.405408	90.7249	1.58395	0.306781	0.00616464	46.9137	101.524	2393	10	Orkhon headwaters hill top	8 of 9
LU1603-001	11MOLA72	I52	laser fusion	151.768	696.603	0.543802	397.74	2834.01	32.3791	0.568962	5.94359	1.37691	0.245517	0.00581203	46.9186	101.53	2372	5	Orkhon headwaters hill top	6 of 9
LU1604-001	11MOLA73	I52	laser fusion	0.500399	535.069	0.0104379	364.989	1698.77	21.2158	0.312433	91.9816	1.26353	0.293318	0.00738823	46.9188	101.517	2362	15	Orkhon headwaters hill top	5 of 9
LU1605-001	11MOLA74	I52	laser fusion	0.231431	467.244	0	888.98	598.18	3.08266	0.0553311	89.6683	3.07751	0.818119	0.0202261	46.9176	101.536	2288	5	Orkhon headwaters hill top	3 of 9
LU1606-001	11MOLA76	I52	laser fusion	0.360017	459.316	0	216.984	143.03	3.01991	0.165593	57.3163	0.751164	0.203135	0.00526847	46.7983	101.688	1951	12	Orkhon tributary	1 of 2	30
LU1607-001	11MOLA78	I52	laser fusion	0.667727	703.333	0.997803	631.348	2994.01	21.6144	0.308375	93.806	2.18563	0.38599	0.00930567	46.8218	101.699	1920	2	upstream of Orkhon falls	1 of 6
LU1608-001	11MOLA79	I52	laser fusion	0.564741	661.78	0.443212	484.73	287.034	2.71308	0.283302	63.1946	1.67806	0.31496	0.0063292	46.8218	101.699	1922	10	upstream of Orkhon falls	2 of 6
LU1609-001	11MOLA80	I52	laser fusion	0.191787	813.265	0.197663	280.713	200.642	3.27433	0.499693	77.9241	0.971784	0.148422	0.00298371	46.8218	101.699	1932	5	upstream of Orkhon falls	3 of 6
LU1610-001	11MOLA81	I52	laser fusion	1.93399	565.345	0.185105	256.039	139.464	2.49581	0.129437	19.6121	0.886365	0.194742	0.00481984	46.8218	101.699	2002	2	upstream of Orkhon falls	6 of 6	84
LU1611-001	11MOLA82	I52	laser fusion	0.300571	488.251	0	221.713	141.979	2.93385	0.152241	61.4812	0.767534	0.195261	0.00503764	46.8218	101.699	1977	12	upstream of Orkhon falls	4 of 6
LU1613-001	11MOLA84a	I52	laser fusion	1.74081	736.718	0	884.865	3093.05	15.9569	0.228379	85.7278	3.06326	0.516469	0.0120479	45.7697	100.915	1896	4	SE of Bayanhongor A	1 of 9
LU1614-001	11MOLA84b	I52	laser fusion	1.19188	690.119	0.0467766	373.855	1284.12	15.681	0.238078	78.4654	1.29423	0.232942	0.00549205	45.7697	100.915	1900	9	SE of Bayanhongor A	2 of 9	40
LU1617-001	11MOLA89	I52	laser fusion	0.330909	481.074	0	755.525	4631.56	27.8921	0.393742	97.923	2.61551	0.675314	0.0176764	45.5059	101.104	1578	3	north of Bogd	2 of 2
LU1618-001	11MOLA90	I52	laser fusion	0.70622	674.298	0	472.402	2906.12	27.9893	0.399375	93.2916	1.63538	0.301251	0.00717924	45.5069	101.091	1542	5	north of Bogd	1 of 2	38
LU1619-001	11MOLA92	I52	laser fusion	0.440735	517.321	0.551145	487.62	1680.13	15.73	0.231906	92.791	1.68806	0.405312	0.010068	45.722	101.064	1895	2	SE of Bayanhongor B	1 of 3	41
LU1620-001	11MOLA93	I52	laser fusion	0.840663	838.785	0	836.815	3006.51	16.399	0.278316	92.3536	2.89692	0.42899	0.00861831	47.129	100.948	2605	15	Tsugalt	10 of 10	191
LU1621-001	11MOLA94	I52	laser fusion	1.77359	681.809	0.395735	665.696	2466.76	16.9112	0.243235	82.4656	2.30453	0.419838	0.00989908	47.132	100.95	2600	5	Tsugalt	9 of 10
LU1622-001	11MOLA95	I52	laser fusion	4.74282	622.649	0.0721196	446.273	1611.16	16.4783	0.243187	53.4747	1.54492	0.308195	0.00716308	47.132	100.95	2590	6	Tsugalt	8 of 10
LU1624-001	11MOLA97	I52	laser fusion	1.44488	621.738	0.0180733	585.548	2114.98	16.4861	0.239788	83.1916	2.02707	0.404971	0.0095194	47.1355	100.949	2555	5	Tsugalt	5 of 10
LU1625-001	11MOLA98	I52	laser fusion	3.09227	522.185	0.505552	432.509	1567.65	16.5433	0.366558	63.1689	1.49728	0.356155	0.00715671	47.1436	100.955	2485	4	Tsugalt	3 of 10
LU1626-001	11MOLA99	I52	laser fusion	2.15347	658.674	0.0892479	686.37	2854.52	18.9692	0.320248	81.7612	2.3761	0.448081	0.00900316	47.1414	100.959	2438	1	Tsugalt	2 of 10
LU1845-001	11MOPZ01	I57	laser fusion	1.03475	305.342	0.97344	148.729	745.772	12.0638	0.202763	70.4571	1.19712	0.209449	0.00419985	47.2332	100.096
LU1846-001	11MOPZ02	I57	laser fusion	0.560195	206.506	0.484166	69.3052	328.478	11.405	0.273669	66.0591	0.557839	0.144312	0.00289475	47.2337	100.097
LU1849-001	11MOPZ03	I57	laser fusion	0.184262	388.009	3.19838	113.869	201.353	4.26347	0.165872	77.1114	0.916534	0.126192	0.002531	47.2061	99.8819
LU1850-001	11MOPZ04	I57	laser fusion	0.267891	262.668	2.11053	77.9629	137.459	4.25109	0.212491	62.4071	0.627524	0.127629	0.00256015	47.2043	99.8821
LU1851-001	11MOPZ08	I57	laser fusion	0.476124	482.549	2.64419	220.699	890.979	9.71905	0.159434	85.508	1.77641	0.196665	0.00394387	47.3323	100.107	2320	8	Chulute upstream	3 of 11
LU1852-001	11MOPZ09	I57	laser fusion	0.321664	272.037	1.23189	190.952	703.819	8.87556	0.15187	87.1288	1.53697	0.30183	0.006054	47.3314	100.107	2300	8	Chulute upstream	5 of 11
LU1798-SH	11MOPZ10	I57	Step Heat	52.6838	1927.33	7.1044	1504.89	6690.7	9.98569	0.43389	plateau age		0.0245463	0.00319824	47.3319	100.106									plateau age
LU1799-SH	11MOPZ11	I57	Step Heat	61.7781	2307.97	8.44722	1714.11	7881.82	10.4805	0.849824	plateau age		0.00786094	0.00319589	47.3323	100.106									plateau age
LU1762-001	11MOPZ12	I55	laser fusion	0.234726	424.697	2.18045	336.454	853.681	7.97143	0.128463	91.4241	3.2622	0.340655	0.00683717	47.2696	100.015	2469	9	Keck Camp	5 of 11
LU1848-001	11MOPZ13	I57	laser fusion	0.226265	398.64	1.24406	229.604	836.338	8.77147	0.143365	91.5112	1.84809	0.247666	0.00496596	47.2686	100.015	2449	13	Keck Camp	3 of 11
LU1853-001	11MOPZ14	I57	laser fusion	0.520268	258.241	1.35828	154.685	288.537	4.49715	0.131201	64.1901	1.24506	0.257568	0.00516567	47.268	100.018	2425	14	Keck Camp	2 of 11
LU1764-001	11MOPZ15a	I55	laser fusion	0.171076	250.716	1.5804	419.547	1801.39	13.4689	0.19701	96.5062	4.06786	0.719561	0.0144445	46.3066	99.1264
LU1856-001	11MOPZ15b	I57	laser fusion	1.98965	285.125	2.32384	432.482	2381.66	13.2448	0.191638	79.6591	3.48105	0.652231	0.0130834	46.3066	99.1264
LU1800-SH	11MOPZ16	I57	Step Heat	0.767705	1367.91	5.64882	1651.37	8099.66	11.8369	0.145639	plateau age		0.00917715	0.00150053	46.3154	98.8397									plateau age
LU1765-001	11MOPZ17a	I55	laser fusion	0.885649	264.408	0.993448	378.179	1420.37	11.7872	0.176137	83.7806	3.66676	0.615022	0.0123453	46.3154	98.8397
LU1847-001	11MOPZ17b	I57	laser fusion	0.399812	246.663	1.304	443.166	2163.03	11.7438	0.169373	93.9689	3.56705	0.772556	0.0154909	46.3154	98.8397
LU1857-001	11MOPZ18	I57	laser fusion	0.195996	157.738	0.647383	124.729	4546.56	85.9173	1.19337	98.6173	1.00395	0.340017	0.00682035	46.6962	96.5293
LU1858-001	11MOPZ20	I57	laser fusion	3.42533	204.831	1.1357	117.678	4157.6	83.3346	1.15975	80.3357	0.947192	0.247041	0.00495572	46.7084	96.5467
LU1766-001	11MOPZ20a	I55	laser fusion	4.04789	309.755	1.64708	175.947	4759.45	83.2272	1.15822	79.8324	1.70596	0.244249	0.00490304	46.7084	96.5467
LU2020-001	12MOBI05	I58	laser fusion	0.421556	485.79	0.429884	502.718	790.429	5.79035	0.100585	86.2816	1.62563	0.444983	0.00919998	48.9944	103.245
LU2023-001	12MOBI06	I58	laser fusion	0.216537	234.843	0.167089	217.282	182.071	3.08822	0.127596	73.8514	0.70262	0.397846	0.00836495	48.6243	103.547
LU1984-001	12MOBI07	I58	laser fusion	0.451181	416.698	0.388533	548.47	1559.38	10.4569	0.186758	92.0581	1.77358	0.565979	0.0116977	48.1954	103.921
LU2031-001	12MOLA01	I58	laser fusion	0.86156	415.959	0.391795	563.162	2047.17	13.3591	0.19532	88.891	1.82109	0.582172	0.0120184	47.8774	103.823	1050	7	Dashinchilen	1 of 1
LU1989-001	12MOLA02	I58	laser fusion	0.459498	589.368	0.497505	311.174	341.724	4.04621	0.162476	71.4616	1.00624	0.227031	0.00467627	48.8602	101.755	1373	6	Hanuy Gol canyon	1 of 20
LU2033-001	12MOLA03	I58	laser fusion	2.49984	596.709	0.417479	244.631	274.196	4.12967	0.14073	27.0559	0.791059	0.176286	0.00363576	48.8602	101.755	1386	5	Hanuy Gol canyon	4 of 20
LU2025-001	12MOLA04	I58	laser fusion	2.83065	575.813	0.393058	263.62	302.413	4.22645	0.127801	26.5402	0.852464	0.196864	0.00406	48.86	101.755	1397	4	Hanuy Gol canyon	7 of 20
LU2001-001	12MOLA05	I58	laser fusion	0.593735	509.004	0.24555	330.859	366.514	4.0815	0.103851	67.5375	1.06989	0.279505	0.00576728	48.8596	101.754	1429	6	Hanuy Gol canyon	13 of 20
LU1962-001	12MOLA06	I58	laser fusion	1.0625	446.227	0.272242	334.815	372.568	4.09987	0.113385	54.2108	1.08268	0.322639	0.00156691	48.8593	101.753	1450	8	Hanuy Gol canyon	17 of 20
LU1968-001	12MOLA07	I58	laser fusion	0.434658	524.273	0.331224	381.111	415.652	4.01844	0.114566	76.2779	1.23239	0.312581	0.0064295	48.8592	101.753	1466	5	Hanuy Gol canyon	19 of 20	153	170	42.305
LU2035-001	12MOLA10	I58	laser fusion	2.71858	354.37	0.305956	354.828	365.26	3.79306	0.121987	31.235	1.1474	0.430556	0.00886928	48.6297	102.867	1230	20	Orkhon canyon	1 of 11
LU2007-001	12MOLA11	I58	laser fusion	0.152599	185.456	0.128553	183.096	156.255	3.14513	0.137429	77.448	0.592074	0.424527	0.0088539	48.6297	102.865	1310	15	Orkhon canyon	4 of 11
LU1988-001	12MOLA13	I58	laser fusion	0.456322	405.349	0.378639	503.319	422.845	3.09619	0.131489	75.6703	1.62757	0.533927	0.0110416	48.6307	102.865	1394	16	Orkhon canyon	11 of 11	235	180	58.136
LU1810-001	12MOLA15	I57	laser fusion	0.375803	159.099	1.25336	227.251	25.5367	0.271238	0.0822966	17.4375	1.82914	0.614196	0.0123337	48.9272	102.752	1558	n/a	Bulgan Cone	1 of 1
LU2038-001	12MOLA17	I58	laser fusion	0.154117	354.332	0.312882	354.518	567.133	5.89116	0.134183	92.4475	1.1464	0.430225	0.00886608	49.3221	103.078	985	3	Selenga north of Bulgan	1 of 6
LU1992-001	12MOLA19	I58	laser fusion	0.294062	454.051	1.82658	604.966	946.39	5.76115	0.131247	91.4718	1.95627	0.57292	0.0118323	49.3209	103.078	1030	12	Selenga north of Bulgan	4 of 6
LU2032-001	12MOLA20	I58	laser fusion	0.446935	671.016	0.595589	619.516	983.97	5.84909	0.0956521	88.0576	2.00332	0.396998	0.00818457	49.3204	103.077	1075	9	Selenga north of Bulgan	6 of 6	99	199	34.0224
LU1809-001	12MOLA22	I57	laser fusion	0.193915	327.307	0.45164	142.935	589.132	9.92214	0.192272	90.269	1.15049	0.187781	0.00376945	50.787	100.532	1670	9	Southern Hovsgol	2 of 4
LU1973-001	12MOLA23	I58	laser fusion	0.697883	555.806	0.266145	318.745	822.671	9.49518	0.160052	79.9028	1.03072	0.246598	0.0050926	50.7873	100.533	1684	6	Southern Hovsgol	4 of 4	32
LU1803-001	12MOLA24	I57	laser fusion	1.50525	271.852	0.84315	146.785	1497.38	24.4588	0.296842	76.8451	1.18147	0.232176	0.000527302	51.2163	100.757	1645	11	North Hovsgol	1 of 8
LU1972-001	12MOLA25	I58	laser fusion	1.62925	588.133	0.361875	460.24	3015.02	24.0039	0.343364	86.2059	1.48827	0.336494	0.00694597	51.2167	100.761	1700	7	North Hovsgol	4 of 8
LU1981-001	12MOLA26	I58	laser fusion	3.12454	588.426	0.251498	300.691	1964.53	23.9399	0.397154	68.0123	0.972338	0.219734	0.00453705	51.2168	100.747	1707	10	North Hovsgol	5 of 8
LU1983-001	12MOLA27	I58	laser fusion	0.183848	418.756	0.185752	307.142	2050.43	24.4583	0.400234	97.3876	0.9932	0.315389	0.00653047	51.2159	100.778	1809	18	North Hovsgol	8 of 8	182
LU1996-001	12MOLA28	I58	laser fusion	0.440931	372.364	0.190398	235.104	653.481	10.2237	0.302241	83.3205	0.76025	0.271494	0.00563395	50.9985	100.718	1763	5	Mid Hovsgol	4 of 4
LU2036-001	12MOLA29	I58	laser fusion	0.578378	615.186	0.315669	391.296	1027.21	9.65729	0.165875	85.6727	1.26533	0.273507	0.00562807	50.9985	100.718	1773	5	Mid Hovsgol	3 of 4
LU1986-001	12MOLA30	I58	laser fusion	0.48882	468.796	0.221383	315.456	867.793	10.1187	0.243749	85.6712	1.02008	0.28935	0.00598198	50.9971	100.718	1725	3	Mid Hovsgol	2 of 4
LU1862-001	12MOLA31	I57	laser fusion	27.5956	77.0656	1.08241	186.14	1947.32	25.0787	0.366476	19.2603	1.49824	1.0386	0.0208542	50.9945	100.712	1670	2	Mid Hovsgol	1 of 4
LU2002-001	12MOLA32	I58	laser fusion	0.679765	531.224	0.870801	410.603	1386.95	12.4167	0.191388	87.3001	1.32776	0.332363	0.00685725	50.5493	101.39	1276	2	Tsagaan-Uur	1 of 8
LU2027-001	12MOLA33	I58	laser fusion	1.07084	378.589	0.559189	251.699	847.484	12.3773	0.206757	72.7783	0.813914	0.285879	0.00590421	50.535	101.39	1340	12	Tsagaan-Uur	2 of 8
LU1863-001	12MOLA34	I57	laser fusion	0.72654	184.97	0.339496	73.0985	382.695	12.5937	0.307433	63.6973	0.588371	0.169932	0.00340997	50.5524	101.39	1370	12	Tsagaan-Uur	3 of 8
LU2021-001	12MOLA35	I58	laser fusion	0.988209	603.923	0.264456	342.514	1147.19	12.3123	0.191852	79.6681	1.10758	0.243874	0.00503344	50.5532	101.391	1417	15	Tsagaan-Uur	6 of 8
LU2022-001	12MOLA36	I58	laser fusion	0.162083	326.548	0.17301	201.398	644.001	11.7566	0.207896	93.018	0.651257	0.265202	0.0055204	50.5532	101.391	1442	10	Tsagaan-Uur	7 of 8
LU1861-001	12MOLA37	I57	laser fusion	0.181904	375.898	0.614333	201.864	992.28	11.8271	0.18773	94.0135	1.6248	0.230918	0.00463217	50.5533	101.391	1460	3	Tsagaan-Uur	8 of 8	187	320	27.0565
LU1829-001	12MOLA38	I57	laser fusion	1.23424	204.59	0.348031	91.2976	397.817	10.4879	0.257622	51.9102	0.734856	0.191886	0.00385683	50.6161	100.716	1655	10	Chandman	1 of 5
LU2000-001	12MOLA39	I58	laser fusion	2.25262	322.086	0.147083	159.854	455.942	10.4903	0.224329	40.6388	0.516918	0.213413	0.00441528	50.6166	100.715	1685	5	Chandman	4 of 5	45
LU2003-001	12MOLA40	I58	laser fusion	0.472217	155.474	0.0834298	122.069	834.547	25.0436	0.416169	85.6514	0.394732	0.337611	0.00707468	49.8468	100.052	1862	10	north of Moron	2 of 4
LU1805-001	12MOLA41	I57	laser fusion	0.412773	172.705	0.40467	277.204	3018.63	26.0974	0.372592	95.7486	2.23122	0.69018	0.0138571	49.8481	100.052	1900	10	north of Moron	3 of 4
LU1998-001	12MOLA42	I58	laser fusion	1.06076	420.487	0.304209	381.246	2550.54	24.5099	0.350975	89.0296	1.23283	0.389871	0.00805156	49.8464	100.052	1936	5	north of Moron	4 of 4	119
LU1826-001	12MOLA43	I57	laser fusion	0.196903	292.947	0.690894	167.793	396.476	5.69485	0.131433	85.8643	1.35057	0.246293	0.00494032	51.4387	99.2168	1545	10	Darkhad	1 of 8
LU1994-001	12MOLA44	I58	laser fusion	0.32976	631.357	0.308944	401.42	626.184	5.7448	0.176229	86.4277	1.29806	0.273396	0.00563804	51.4389	99.2172	1555	10	Darkhad	2 of 8
LU1982-001	12MOLA45	I58	laser fusion	0.346527	559.25	0.176589	219.499	336.995	5.65423	0.299081	76.6115	0.70979	0.16877	0.00349129	51.4392	99.2173	1588	4	Darkhad	4 of 8
LU2004-001	12MOLA46	I58	laser fusion	0.218353	313.205	0.111908	107.84	166.744	5.69441	0.236604	72.0268	0.348719	0.148053	0.00306969	51.4395	99.2176	1604	7	Darkhad	6 of 8
LU2034-001	12MOLA47	I58	laser fusion	0.561288	638.51	0.36812	356.878	516.276	5.32824	0.131	75.597	1.15403	0.240337	0.00494325	51.44	99.2178	1621	7	Darkhad	8 of 8	83	83
LU1990-001	12MOLA48	I58	laser fusion	3.63931	455.526	0.427397	662.705	4165.52	23.0378	0.338544	79.4582	2.14298	0.625569	0.0129209	50.1398	99.3206	1960	14	Arbulag A	1 of 4
LU1975-001	12MOLA49	I58	laser fusion	4.76909	450.754	0.353663	486.928	3066.08	23.0784	0.33011	68.4942	1.57457	0.464509	0.00961326	50.14	99.3038	1974	10	Arbulag A	2 of 4
LU1979-001	12MOLA51	I58	laser fusion	0.59839	440.195	0.531093	686.526	4329.94	23.1157	0.327706	96.0444	2.22001	0.670626	0.013878	50.1399	99.3187	2011	7	Arbulag A	3 of 4	105
LU1997-001	12MOLA52	I58	laser fusion	0.5392	429.67	0.424928	697.482	4407.4	23.1594	0.327933	96.4783	2.25543	0.698018	0.0144492	50.1001	99.3973	1932	8	Arbulag B	1 of 6
LU2010-001	12MOLA53	I58	laser fusion	0.40354	384.031	0.24496	350.595	2006	20.9829	0.304835	94.3545	1.13371	0.392561	0.00810738	50.1009	99.3729	2021	11	Arbulag B	6 of 6	100
LU1987-001	12MOLA54	I58	laser fusion	0.361535	470.995	0.382633	539.523	3082	20.9491	0.31644	96.6137	1.74465	0.492564	0.0101736	50.1041	99.3779	2000	11	Arbulag B	4 of 6
LU1993-001	12MOLA55	I58	laser fusion	1.81034	415.944	3.3005	397.452	2257.02	20.8261	0.30162	80.814	1.28523	0.410883	0.00851056	50.1088	99.3779	1979	7	Arbulag B	3 of 6
LU1864-001	12MOLA56	I57	laser fusion	0.611181	135.709	10.9251	437.49	2410.04	13.2492	0.197394	92.3005	3.52136	1.38621	0.0278516	49.5402	98.0253	1970	8	Tsagaan Uul	1 of 10
LU1980-001	12MOLA57	I58	laser fusion	0.432627	294.826	0.431603	602.974	2006.72	12.2343	0.201584	93.9527	1.94983	0.879429	0.0182805	49.5235	98.0273	2003	19	Tsagaan Uul	2 of 10
LU2006-001	12MOLA58	I58	laser fusion	0.371099	320.163	0.362867	455.83	1520.84	12.265	0.182011	93.2175	1.47401	0.61221	0.0126584	49.5237	98.0282	2053	5	Tsagaan Uul	4 of 10
LU2039-001	12MOLA59	I58	laser fusion	0.505149	285.008	1.03553	865.873	2708.19	11.5002	0.167321	94.712	2.79996	1.30637	0.0269488	49.525	98.0299	2070	8	Tsagaan Uul	6 of 10
LU1974-001	12MOLA60	I58	laser fusion	1.97472	464.543	0.48049	705.706	2216.66	11.5491	0.167879	79.1176	2.28203	0.65323	0.0135148	49.5253	98.0296	2086	5	Tsagaan Uul	7 of 10
LU1964-001	12MOLA61	I58	laser fusion	0.794817	370.245	0.387584	528.418	1627.3	11.3238	0.17508	87.334	1.70873	0.6137	0.012642	49.5256	98.029	2102	2	Tsagaan Uul	10 of 10	134
LU2040-001	12MOLA62	I58	laser fusion	1.15115	412.703	0.511911	713.096	2336.04	12.0433	0.179135	87.2373	2.30593	0.742983	0.0152926	49.4711	97.7823	1715	2	Tsagaan Uul Valley	1 of 4
LU2008-001	12MOLA63	I58	laser fusion	0.251619	253.116	0.254219	335.545	741.321	8.13093	0.136722	90.8014	1.08505	0.570033	0.0118206	49.4711	97.7823	1757	16	Tsagaan Uul Valley	3 of 4
LU1999-001	12MOLA64	I58	laser fusion	0.673841	199.27	0.210343	264.938	585.036	8.12687	0.151275	74.5525	0.856726	0.571703	0.0119157	49.4711	97.7823	1773	8	Tsagaan Uul Valley	4 of 4	68	68	8.3673
LU1967-001	12MOLA65	I58	laser fusion	0.233416	336.798	0.421302	540.501	1376.28	9.36799	0.147647	95.1506	1.74781	0.690072	0.0142305	49.1634	97.6578	2081	14	burst lake fault	1 of 4
LU1978-001	12MOLA67	I58	laser fusion	0.370433	502.973	0.430086	630.396	1616.06	9.43134	0.140822	93.5815	2.0385	0.538936	0.0111364	49.1636	97.658	2095	12	burst lake fault	2 of 4
LU1828-001	12MOLA68	I57	laser fusion	0.193154	226.34	0.487934	302.6	1212.1	9.64354	0.148605	94.556	2.43563	0.574879	0.0115383	49.1653	97.6583	2142	2	burst lake fault	4 of 4	63
LU2024-001	12MOLA69	I58	laser fusion	3.73815	325.101	0.324413	244.765	17511.2	246.327	3.26441	94.0635	0.791492	0.323742	0.00674152	47.7549	97.1833	2234	n/a	Otgontengor valley	1 of 1
LU1963-001	12MOLA70	I58	laser fusion	1.62362	328.717	0.389966	279.221	19421.8	239.924	3.18209	97.5863	0.902911	0.365253	0.00752724	47.7433	96.9131	1796	n/a	Otgontengor valley dike	1 of 1
LU1966-001	12MOLA71	I58	laser fusion	0.697027	337.871	0.20974	224.687	919.205	15.0276	0.26648	81.6591	0.726566	0.285954	0.00589323	46.5368	98.8325	2359	11	Bayanbulag	1 of 3
LU2009-001	12MOLA72	I58	laser fusion	1.01135	327.059	0.16832	222.911	910.116	14.9977	0.245745	75.2494	0.720823	0.293071	0.00606114	46.5406	98.8352	2374	2	Bayanbulag	2 of 3
LU1985-001	12MOLA73	I58	laser fusion	0.317976	473.246	0.323665	400.654	1595.64	14.6308	0.259092	94.3895	1.29559	0.364042	0.00752018	46.547	98.8396	2448	15	Bayanbulag	3 of 3	89
LU1970-001	12MOLA74	I58	laser fusion	0.569427	461.555	0.535296	648.371	179.244	1.01944	0.0583855	51.3718	2.09663	0.604043	0.012435	46.4187	100.852	2140	36	Erdenetsogt	1 of 1	36
LU1970-002	12MOLA74	I58	laser fusion	0.508474	395.623	0.362921	478.343	101.953	0.786009	0.0553307	40.2589	1.54681	0.519907	0.010735	46.4187	100.852	2140	36	Erdenetsogt	1 of 1	36
LU1969-001	12MOLA75	I58	laser fusion	0.380081	430.178	0.351367	401.248	235.61	2.16463	0.0973892	67.5503	1.29751	0.401081	0.0082564	46.7271	101.417	2464	15	Orkhon south branch young	3 of 3	124	124	57.2847
LU1977-001	12MOLA76	I58	laser fusion	0.391266	539.262	0.412356	559.52	322.895	2.12742	0.0563609	73.4292	1.80931	0.446153	0.00921715	46.727	101.418	2450	14	Orkhon south branch young	1 of 3
LU1971-001	12MOLA77	I58	laser fusion	2.67682	695.552	0.196151	254.901	1522.16	21.8937	0.329021	65.7886	0.82427	0.157584	0.00325038	46.7237	101.425	2393	15	Orkhon south branch old	1 of 3
LU2005-001	12MOLA78	I58	laser fusion	4.57535	444.858	0.156626	187.283	1152.63	22.5602	0.349985	46.0123	0.605614	0.181028	0.00373927	46.7334	101.421	2620	20	Orkhon south branch old	2 of 3
LU2026-001	12MOLA79	I58	laser fusion	1.69314	249.206	0.1972	251.177	1299.32	18.9809	0.289062	72.1765	0.812226	0.433401	0.00898855	46.7515	101.411	2716	13	Orkhon south branch old	3 of 3	336	389	23.1324
LU1991-001	12MOLA80	I58	laser fusion	1.08895	545.124	0.708539	720.686	462.205	2.3641	0.0944509	58.836	2.33047	0.568486	0.0117231	46.7931	101.768	1910	15	Orkhon falls upstream	1 of 6
LU1976-001	12MOLA81	I58	laser fusion	0.433143	502.357	0.421949	571.514	356.579	2.29993	0.0613048	73.3974	1.84809	0.489196	0.0101093	46.793	101.768	1933	8	Orkhon falls upstream	3 of 6
LU1995-001	12MOLA82	I58	laser fusion	0.209837	472.764	0.241449	312.832	202.813	2.38979	0.205511	76.3851	1.0116	0.284535	0.00588306	46.7924	101.768	1956	6	Orkhon falls upstream	6 of 6	52	67	28.036
LU1965-001	12MOLA83	I58	laser fusion	0.503096	429.439	0.306554	357.747	-0.426119	-0.00439357	0.099672	-0.285965	1.15684	0.358214	0.00737482	46.7772	101.899	1855	11	Above Orkhon falls	1 of 1			flow
LU1812-001	CI-11-1	I57	laser fusion	0.131903	193.837	0.958326	128.846	313.063	5.85574	0.341499	87.5406	1.03708	0.285826	0.00576219	48.1721	100.438			Up canyon from Chuluut				Top flow
LU1816-001	CI-11-11	I57	laser fusion	0.227981	290.55	0.709158	279.423	34.4903	0.297936	0.158034	30.2866	2.24908	0.413533	0.00831808	48.213	100.396			Chuluut				Thick flow
LU1814-001	CI-11-12	I57	laser fusion	0.287236	159.409	35.3927	288.454	9.8154	0.0821382	0.0575419	9.15984	2.32177	0.778095	0.0156103	48.2347	100.235			Chuluut-Saumuin confluence				flow
LU1817-001	CI-11-2	I57	laser fusion	0.102384	313.367	0.862955	208.965	14.0386	0.162164	0.218877	26.3526	1.68196	0.28674	0.00576929	48.0818	99.9177			Gitchigan section bottom				flow
LU1818-001	CI-11-3	I57	laser fusion	0.148718	261.41	0.442147	201.778	4.92442	0.058911	0.222345	8.5598	1.62412	0.331911	0.00667873	48.0818	99.9177			Gitchigan section top				massive basalt
LU1815-001	CI-11-4	I57	laser fusion	0.556132	126.053	2.93222	176.406	15.0395	0.205787	0.104021	8.043	1.4199	0.601767	0.0120936	48.0988	99.9225			Haer				welded scoria
LU1813-001	CI-11-6	I57	laser fusion	2.73965	203.065	4.33201	249.717	25.2921	0.244473	0.0696811	2.9908	2.00998	0.528788	0.0106076	48.0051	99.7479			Gitchigan head cone
LU1827-001	DS13-11	I57	laser fusion	0.125082	223.258	0.315538	236.423	1827.49	18.5634	0.268793	97.4968	1.90297	0.455356	0.00913436	45.7168	101.072	1933	2.7
LU1865-001	DS13-12	I57	laser fusion	0.33261	281.846	1.34241	291.733	286.978	2.37302	0.102809	71.9441	2.34817	0.445086	0.00893138	46.7999	101.761	1951	3.2
LU1820-001	DS13-14	I57	laser fusion	0.490242	251.555	0.559959	195.437	182.043	2.2471	0.232106	54.297	1.57307	0.334074	0.00672519	46.7999	101.761	1951	3.3
LU1821-001	DS13-16B	I57	laser fusion	0.348891	257.835	6.11385	207.055	21.8387	0.254586	0.24139	16.3239	1.66659	0.345312	0.00694935	46.7887	101.961	1804	2
LU1819-001	DS13-17	I57	laser fusion	0.548671	221.693	0.870771	163.039	26.8901	0.398086	0.101687	13.7188	1.3123	0.316234	0.00634357	48.0962	100.316	1833	5.9
LU1824-001	DS13-2	I57	laser fusion	0.343014	426.033	3.91058	274.919	1042.13	9.12736	0.203163	90.2135	2.21283	0.277479	0.00558038	47.4481	100.201	2119	6.7
LU1867-001	DS13-20	I57	laser fusion	0.349087	282.657	1.19851	285.108	53.618	0.45391	0.104006	31.5248	2.29484	0.43373	0.0087033	48.1843	100.2	1935	3.6
LU1822-001	DS13-4	I57	laser fusion	0.393125	302.333	1.37774	112.945	438.637	9.35059	0.389963	78.3806	0.909095	0.160638	0.00323494	47.245	100.032	2524	3.75
LU1823-001	DS13-7	I57	laser fusion	0.270714	332.219	0.528612	143.893	534.584	8.94595	0.315748	86.1247	1.15819	0.186244	0.00374864	47.2651	99.668	2500	2.3
LU1866-001	DS13-8	I57	laser fusion	0.196014	395.806	1.79349	249.486	950.521	9.17356	0.17291	93.1798	2.00811	0.271039	0.00543816	47.2099	100.01	2240	2.3
LU1805-001	KW081012-1	I57	laser fusion	0.424926	311.899	1.95171	218.59	375.198	4.13862	0.131193	73.5306	1.75944	0.30136	0.00604487	47.1366	99.8633	3057	3	first valley to SW from Egiin Davaa	~30	>223	>223
LU1806-001	KW081012-2	I57	laser fusion	0.5278	241.034	2.00478	101.93	177.755	4.20471	0.184309	52.5667	0.820439	0.181842	0.00365287	47.1346	99.8627	2990	3	first valley to SW from Egiin Davaa	~15	>223	>223
LU1804-001	KW081012-3	I57	laser fusion	0.224006	274.3	1.09035	78.4304	145.948	4.48641	0.238258	67.7083	0.631288	0.12295	0.00247162	47.138	99.8579	2834	3	first valley to SW from Egiin Davaa	~5	>223	>223
LU1825-001	MN080312-1	I57	laser fusion	1.52044	163.279	21.57	185.408	11.6019	0.151045	0.146282	2.4751	1.49235	0.488276	0.00979618	47.9279	97.1351	2090	?	Chigestei valley	?	?	?			Possibly float
LU2017-001	SGS-HP01	I58	laser fusion	0.667589	496.504	0.245025	325.355	947.663	10.712	0.177992	82.7185	1.05209	0.281775	0.00582605	47.2483	100.05	2480	3	Valley SE of Keck Camp	1	277	367
LU2014-001	SGS-HP02	I58	laser fusion	0.511567	882.007	0.357319	359.632	1260.25	12.8799	0.198441	89.2405	1.16294	0.175329	0.00361318	47.1839	100.101	2992	3	base of keck section from SW corner of valley	1	392	498
LU2013-001	SGS-HP03	I58	laser fusion	0.875091	597.128	0.610318	593.787	1548.17	9.59172	0.142841	85.6269	1.92012	0.427594	0.00881499	47.1773	100.111	3117	3	lower in the Keck section from south side of valley	30	267	498
LU2012-001	SGS-HP04	I58	laser fusion	0.970835	612.619	0.417794	526.551	1094.93	7.65398	0.12017	79.1736	1.7027	0.369588	0.0076198	47.0964	99.9351	3328	5	top of the 3-Tors section	90	450	535
LU2011-001	SGS-HP05	I58	laser fusion	0.756615	1027.34	0.322764	437.47	1095.05	9.20961	0.146503	82.9833	1.41464	0.183106	0.00377229	47.1216	99.9447	2878	5	base of the 3-Tors section	1	450	85
LU1425	TK-D50	I48	Step Heat	8673.27	7.29913e+06	67603.9	3.39686e+06	7.43135e+06	7.9616	0.171238	plateau age		0.0428784	0.034429	47.2001	100.116	3191		Keck Cirque						signal size in mV run on VG3600
LU1426	TK-D2	I49	Step Heat	2833.21	6.04656e+06	61639	2.66759e+06	7.49458e+06	9.97244	0.211041	plateau age		0.614592	0.057172	47.2004	100.106	2825		Keck Cirque						signal size in mV run on VG3601
LU1427	TK-D63	I50	Step Heat	10780	7.5109e+06	21416.8	2.642e+06	4.49208e+06	6.27085	0.158485	plateau age		0.162665	0.0564569	47.2006	100.12	3365		Keck Cirque						signal size in mV run on VG3602
LU1428	TK-D43	I51	Step Heat	6815.62	7.23635e+06	137874	2.8095e+06	5.97694e+06	7.97	± 0.17	plateau age		0.366534	0.0936215	47.2002	100.114	3127		Keck Cirque						signal size in mV run on VG3603
LU1429	TK-D20	I52	Step Heat	5267.35	5.03202e+06	66892.9	2.46171e+06	5.91388e+06	8.86	± 0.18	inverse isochron age		0.0468348	0.0436292	47.2005	100.112	3001		Keck Cirque						signal size in mV run on VG3604
LU1430	TK-D1	I53	Step Heat	7856.48	8.01111e+06	64742.6	2.4918e+06	6.66186e+06	9.77776	0.4439	inverse isochron age		0.371286	0.124711	47.2052	100.103	2703		Keck Cirque						signal size in mV run on VG3605

## Sheet: DR4
Table DR4. Previously Published Ages
ID	Site_Name	Lat	Long	Age_Ma	Reference
1	Orog	48.18	99.88	0.005	Schlupp (1999)
2	Suman Gol	48.23	100.43	0.53 ± 0.02	Barry et al. (2003)
3	Ohron Gol	46.79	101.96	0.7 ± 0.1	Schlupp (1999)
4	Suman Gol	48.23	100.43	1.3 ± 0.1	Schlupp (1999)
5	Suman Gol	48.23	100.43	5.91 ± 0.02	Barry et al. (2003)
6	Tariat	48.3	100.47	7.5 ± 0.6	Schlupp (1999)
7	Chulut Gol	47.28	100.03	9.0 ± 0.3	Schlupp (1999)
8	Tsetserleg	47.43	101.51	20.7 ± 0.6	Schlupp (1999)
9	Bayan Hongor	46.21	100.64	24.2 ± 1	Schlupp (1999)
10	Ikhe Bogdo	44.85	100.69	26.6 ± 0.4	Schlupp (1999)
11	Egiin Davaa	47.18	99.89	28.5 ± 1*	Devyatkin & Smelov (1980)
12	Bogd	44.68	102.22	30.4 ± 0.1	Barry et al. (2003)
13	Sevrei	43.5	102.17	32.7 ± 0.2	Barry et al. (2003)
14	Sevrei	43.49	102.16	33 ± 0.1	Barry et al. (2003)
15	Lava Rivers on the SE slope of Hangay	46.9302	102.499	0.22 ± 0.03	Yarmolyuk et al (2008)
16	Lava Rivers on the SE slope of Hangay	46.507	102.134	0.25 ± 0.05	Yarmolyuk et al (2008)
17	Lava Rivers on the SE slope of Hangay	46.4224	100.819	1.25 ± 0.10	Yarmolyuk et al (2008)
18	Taryat-Chulutyn lava river	48.2001	100.424	0.36 ± 0.06	Yarmolyuk et al (2008)
19	Taryat-Chulutyn lava river	48.3149	100.461	0.4 ± 0.05	Yarmolyuk et al (2008)
20	Taryat-Chulutyn lava river	48.1185	99.9403	0.46 ± 0.06	Yarmolyuk et al (2008)
21	Taryat-Chulutyn lava river	48.1105	99.9503	0.47 ± 0.04	Yarmolyuk et al (2008)
22	Taryat-Chulutyn lava river	48.1405	100.133	0.51 ± 0.04	Yarmolyuk et al (2008)
23	Taryat-Chulutyn lava river	48.0472	100.058	0.53 ± 0.03	Yarmolyuk et al (2008)
24	Taryat-Chulutyn lava river	48.1394	100.275	0.57 ± 0.06	Yarmolyuk et al (2008)
25	Taryat-Chulutyn lava river	48.0385	99.9905	0.58 ± 0.03	Yarmolyuk et al (2008)
26	Taryat-Chulutyn lava river	48.1134	100.028	0.6 ± 0.06	Yarmolyuk et al (2008)
27	Taryat-Chulutyn lava river	48.1185	100.025	0.63 ± 0.05	Yarmolyuk et al (2008)
28	Taryat-Chulutyn lava river	48.1066	100.066	0.74 ± 0.03	Yarmolyuk et al (2008)
29	Taryat-Chulutyn lava river	48.4029	100.519	0.75 ± 0.04	Yarmolyuk et al (2008)
30	Lower reaches of the Chulutyn-Gol (near Taryat Depression)	48.1742	100.384	4.55 ± 0.15	Yarmolyuk et al (2008)
31	Lower reaches of the Chulutyn-Gol (near Taryat Depression)	48.3232	100.465	6.0 ± 0.2	Yarmolyuk et al (2008)
32	Lower reaches of the Chulutyn-Gol (near Taryat Depression)	48.407	100.528	6.27 ± 0.16	Yarmolyuk et al (2008)
33	Lower reaches of the Chulutyn-Gol (near Taryat Depression)	48.3222	100.468	7.1 ± 0.2	Yarmolyuk et al (2008)
34	Lower reaches of the Chulutyn-Gol (near Taryat Depression)	48.3319	100.521	7.6 ± 0.2	Yarmolyuk et al (2008)
35	Watershed part of the Hangai Range	47.1345	99.6996	2.1 ± 0.1	Yarmolyuk et al (2008)
36	Watershed part of the Hangai Range	47.1388	99.7424	2.7 ± 0.1	Yarmolyuk et al (2008)
37	Watershed part of the Hangai Range	47.108	99.6847	4.00 ± 0.15	Yarmolyuk et al (2008)
38	Watershed part of the Hangai Range	47.0697	99.7107	4.3 ± 0.2	Yarmolyuk et al (2008)
39	Watershed part of the Hangai Range	47.0609	99.7132	4.5 ± 0.2	Yarmolyuk et al (2008)
40	Watershed part of the Hangai Range	47.2854	99.9836	4.8 ± 0.2	Yarmolyuk et al (2008)
41	Watershed part of the Hangai Range	47.207	99.882	5.0 ± 0.2	Yarmolyuk et al (2008)
42	Watershed part of the Hangai Range	47.3086	100.218	5.5 ± 0.3	Yarmolyuk et al (2008)
43	Watershed part of the Hangai Range	47.3517	100.233	7.4 ± 0.2	Yarmolyuk et al (2008)
44	Watershed part of the Hangai Range	47.3254	102.672	7.8 ± 0.3	Yarmolyuk et al (2008)
45	Watershed part of the Hangai Range	47.4838	100.24	8.0 ± 0.2	Yarmolyuk et al (2008)
46	Watershed part of the Hangai Range	47.1911	99.6477	8.1 ± 0.2	Yarmolyuk et al (2008)
47	Watershed part of the Hangai Range	47.191	99.6475	8.2 ± 0.3	Yarmolyuk et al (2008)
48	Watershed part of the Hangai Range	47.4374	100.21	8.2 ± 0.2	Yarmolyuk et al (2008)
49	Watershed part of the Hangai Range	47.3336	100.107	8.35 ± 0.20	Yarmolyuk et al (2008)
50	Watershed part of the Hangai Range	47.302	100.219	8.75 ± 0.25	Yarmolyuk et al (2008)
51	Watershed part of the Hangai Range	47.3443	100.233	9.6 ± 0.3	Yarmolyuk et al (2008)
52	Watershed part of the Hangai Range	47.459	100.863	12.9 ± 0.3	Yarmolyuk et al (2008)
53	Watershed part of the Hangai Range	47.5839	101.198	13.8 ± 0.6	Yarmolyuk et al (2008)
54	Watershed part of the Hangai Range	47.1219	100.942	16.8 ± 0.5	Yarmolyuk et al (2008)
55	Khaton Sudal	44.5028	101.341	39.4	Hankard et al. (2007)
56	Taatsyn Gol	45.4	101.3	31.5	Hankard et al. (2007)
57	Taastyn Gol	45.5	101.1	28	Hankard et al. (2007)
58	Ust Bokson	52.1	100.3	19.9	Hankard et al. (2007)
59	Taatsyn Gol	45.5	101	12.7	Hankard et al. (2007)
60	Botgon Gol - Keck 2006	47.1999	100.119	6.27 ± 0.16	Tielke (2007)
61	Botgon Gol - Keck 2006	47.2001	100.116	7.96 ± 0.17	Tielke (2007)
62	Botgon Gol - Keck 2006	47.2002	100.115	7.97 ± 0.17	Tielke (2007)
63	Botgon Gol - Keck 2006	47.2005	100.112	8.86 ± 0.18	Tielke (2007)
64	Botgon Gol - Keck 2006	47.2004	100.106	9.97 ± 0.21	Tielke (2007)
65	Botgon Gol - Keck 2006	47.2052	100.103	9.78 ± 0.44	Tielke (2007)
66	Suman Gol	48.23	100.43	0.53 ± 0.02	Barry et al. (2003)
67	Suman Gol	48.23	100.43	1.3 ± 0.1	Barry et al. (2003)
68	Suman Gol	48.23	100.43	5.91 ± 0.02	Barry et al. (2003)
69	Hovsgol	50.8517	100.169	21.4 ± 0.80	Rasskazov et al. (2003)
70	Hovsgol	51.1867	100.319	19.2 ± 1.0	Rasskazov et al. (2003)
71	Hovsgol	51.1833	100.319	17.4 ± 1.00	Rasskazov et al. (2003)
72	Hovsgol	51.6875	100.689	9.7 ± 0.50	Rasskazov et al. (2003)
73	Hovsgol	51.6065	100.622	10.2 ± 0.70	Rasskazov et al. (2003)
74	Hovsgol	51.3942	100.432	9.5 ± 0.30	Rasskazov et al. (2003)
75	Hovsgol	51.0065	100.704	9 ± 0.40	Rasskazov et al. (2003)
76	Hovsgol	51.0748	100.721	9.9 ± 0.50	Rasskazov et al. (2003)
77	Hovsgol	51.0563	100.771	7.8 ± 0.3	Rasskazov et al. (2003)
78	Hovsgol	50.6625	100.289	7.89 ± 0.09	Rasskazov et al. (2003)
79	Hovsgol	50.7645	100.156	8.8 ± 0.2	Ivanenko et al. (1988)
80	Hovsgol	50.7645	100.156	8.1 ± 0.2	Ivanenko et al. (1988)
